1 **Interrogation of SLFN11 in pediatric sarcomas uncovers an unexpected biological role and a**  
2 **novel therapeutic approach to overcoming resistance to replicative stress**

3 Jessica Gartrell<sup>1</sup>, Marcia Mellado-Largarde<sup>2</sup>, Nancy E. Martinez<sup>2</sup>, Michael R. Clay<sup>3</sup>, Armita  
4 Bahrami<sup>4</sup>, Natasha Sahr<sup>5</sup>, April Sykes<sup>5</sup>, Kaley Blankenship<sup>1</sup>, Lauren Hoffmann<sup>1</sup>, Jia Xie<sup>2</sup>, Hyekyung  
5 Plumley<sup>2</sup>, Nathaniel Twarog<sup>2</sup>; Michele Connelly<sup>2</sup>; Koon-Kiu Yan<sup>6</sup>, Jiyang Yu<sup>6</sup>, Shaina N. Porter<sup>7</sup>,  
6 Shondra M. Pruett-Miller<sup>7</sup>, Geoffrey Neale<sup>8</sup>, Christopher L. Tinkle<sup>9</sup>, Sara M. Federico<sup>1</sup>, Elizabeth  
7 A. Stewart<sup>1,10</sup>, Anang A. Shelat<sup>2</sup>

8 <sup>1</sup>Department of Oncology, St. Jude Children's Research Hospital, Memphis, Tennessee. <sup>2</sup>  
9 Department of Chemical Biology and Therapeutics, St. Jude Children's Research Hospital,  
10 Memphis, Tennessee. <sup>3</sup>Department of Pathology, University of Colorado Anschutz Medical  
11 Campus, Aurora, Colorado. <sup>4</sup>Department of Pathology, St. Jude Children's Research Hospital,  
12 Memphis, Tennessee. <sup>5</sup>Department of Biostatistics, St. Jude Children's Research Hospital,  
13 Memphis, Tennessee. <sup>6</sup>Department of Computational Biology, St. Jude Children's Research  
14 Hospital, Memphis, Tennessee. <sup>7</sup>Department of Cell and Molecular Biology and The Center for  
15 Advanced Genomic Engineering, St. Jude Children's Research Hospital, Memphis, Tennessee.  
16 <sup>8</sup>Hartwell Center for Bioinformatics and Biotechnology, St. Jude Children's Research Hospital,  
17 Memphis, Tennessee. <sup>9</sup>Department of Radiation Oncology, St. Jude Children's Research Hospital,  
18 Memphis, Tennessee. <sup>10</sup>Department of Developmental Neurobiology, St. Jude Children's  
19 Research Hospital, Memphis, Tennessee.

20

21 Running Title: The role of SLFN11 in pediatric sarcomas

22 Keywords: SLFN11, pediatrics, sarcoma, replicative stress

23 Financial support: This work was supported, in part, by the American Lebanese Syrian Associated  
24 Charities (E.A.S., A.A.S.). E.A.S. was supported by the National Comprehensive Cancer Network  
25 and is a St. Baldrick's Scholar with generous support from the Invictus Fund. A.A.S. was supported  
26 by research grants from the Sarcoma Foundation of America and the St. Baldrick's Foundation.

27

28 Corresponding authors: (1) Dr. Elizabeth A. Stewart, Department of Oncology and Department  
29 of Developmental Neurobiology, St. Jude Children's Research Hospital, 262 Danny Thomas  
30 Place, Memphis, TN 38105. Tel: +1 901-595-3544; Fax: +1 901-521-9005; Email:  
31 [elizabeth.stewart@stjude.org](mailto:elizabeth.stewart@stjude.org). (2) Dr. Anang A. Shelat, Department of Chemical Biology and  
32 Therapeutics, St. Jude Children's Research Hospital, 262 Danny Thomas Place, Memphis, TN  
33 38105. Tel: +1 901-595-5751; Fax: +1 901-595-5715; Email: [anang.shelat@stjude.org](mailto:anang.shelat@stjude.org).

34 The authors declare there are no conflicts of interest.

35 Word count = 5928; Total figures and tables = 7

36 **Abstract**

37 Pediatric sarcomas represent a heterogeneous group of malignancies that exhibit variable  
38 response to DNA damaging chemotherapy. Schlafen family member 11 protein (SLFN11)  
39 increases sensitivity to replicative stress, and *SLFN11* gene silencing has been implicated as a  
40 common mechanism of drug resistance in tumors in adults. We found SLFN11 to be widely  
41 expressed in our cohort of pediatric sarcomas. In sarcoma cell lines, protein expression strongly  
42 correlated with response to the PARP inhibitor talazoparib (TAL) and the topoisomerase I  
43 inhibitor irinotecan (IRN), with SLFN11 knockout resulting in significant loss of sensitivity *in vitro*  
44 and *in vivo*. However, SLFN11 expression was not associated with favorable outcomes in a  
45 retrospective analysis of our patient cohort; instead, the protein was retained and promoted  
46 tumor growth and evasion. Furthermore, we show that pediatric sarcomas develop resistance to  
47 TAL and IRN through impaired intrinsic apoptosis, and that resistance can be reversed by selective  
48 inhibition of BCL-XL.

49

50 **Statement of Significance**

51 The role of SLFN11 in pediatric sarcomas has not been thoroughly explored. In contrast to its  
52 activity in adult tumors, SLFN11 did not predict favorable outcomes in pediatric patients, was not  
53 silenced, and promoted tumor growth. Resistance to replicative stress in SLFN11-expressing  
54 sarcomas was reversed by selective inhibition of BCL-XL.

55 **INTRODUCTION**

56 Pediatric sarcomas are a heterogeneous group of malignancies disproportionately affecting  
57 adolescents and young adults. Multimodal therapy with chemotherapy, surgery, and radiation  
58 therapy (RT) has improved outcomes for those patients with localized disease. However, progress  
59 has stalled for patients with metastatic disease, who continue to have survival rates of <30% for  
60 the most common subtypes [1-5]. Therefore, novel therapeutic strategies and biomarkers that  
61 predict sensitivity to therapy are needed.

62

63 Previously, we reported that combining the poly (ADP-ribose) polymerase inhibitor (PARPi)  
64 talazoparib (TAL) with the topoisomerase I inhibitor (Topo1i) irinotecan (IRN) and temozolomide  
65 (TMZ) resulted in high rates of complete response (CR) in a murine model of Ewing sarcoma (ES)  
66 [6]. This work motivated a clinical trial testing TAL plus IRN with and without TMZ in children with  
67 refractory/recurrent solid tumors (NCT02392793). Results were encouraging: of 24 evaluable  
68 patients, 1 with Ewing sarcoma (ES) had a complete response (CR), 5 others had a partial response  
69 (PR), and 18 had disease stabilization [7]. However, it remains unclear how the combination  
70 works in this population.

71

72 Although BRCA mutations are rare in ES, several mechanisms have been proposed to explain the  
73 PARPi sensitivity in ES, most notably *functional* BRCA deficiency and SLFN11 [8-11]. Fusion  
74 proteins involving the peptide encoded by *EWSR1* at the N-terminus are the oncogenic drivers in  
75 ES (which has *EWSR1-FLI1/ERG* fusion) and in a subset of aggressive sarcomas, such as

76 desmoplastic small round cell tumors (DSRCTs) (which have *EWSR1-WT1* fusion) and clear cell  
77 sarcomas (which have *EWSR1-ATF1* fusion). Gorthi et al [11] reported that the *EWSR1* fusion  
78 protein increases R-Loop formation, which sequesters BRCA1, rendering the tumor cell BRCA  
79 deficient and susceptible to replicative stress. They speculated that BRCA deficiency might create  
80 a liability in all tumors possessing an *EWSR1*-translocation. Tumors deficient in mediators of  
81 homologous recombination (HR) such as *BRCA1* and *BRCA2* are more susceptible to DNA single  
82 strand breaks: consequently, PARPis are selectively lethal in these cells. However, in contrast to  
83 PARPi treatment of adult tumors with *BRCA1* or *BRCA2* mutations, single-agent PARPi treatment  
84 in patients with relapsed/refractory ES elicited no significant responses or durable disease control  
85 [12].

86

87 Ewing sarcomas express high levels of Schlafen family member 11 (SLFN11), a putative DNA/RNA  
88 helicase whose expression has been associated with the response to DNA damaging agents  
89 (DDAs), thymocyte maturation, viral immunity, and interferon production [13]. SLFN11 augments  
90 sensitivity to replicative stress by stalling replication forks and impairing the DNA repair  
91 checkpoint response [14, 15]. PARPis cause replicative stress through PARP trapping [9], whereby  
92 the PARP protein becomes physically associated with DNA. This is similar to the mechanism of  
93 action of Topo1is, which are well-known inducers of replicative stress [16]. Additionally, PARP  
94 inhibition augments Topo1i toxicity by preventing the recruitment of repair enzymes to the site  
95 of damage, and TMZ enhances PARPi-mediated replicative stress by augmenting PARP trapping  
96 [17]. Therefore, the strategy of combining a PARPi, a Topo1i, and TMZ is a rational means of  
97 exploiting replicative stress in cancer cells. In retrospective studies, patients with ovarian cancer

98 [18], breast cancer [19], prostate cancer [20], and ES-family tumors [10] who were treated with  
99 DDAs had better prognosis if their tumors had high SLFN11 expression. Patients with small-cell  
100 lung cancer expressing SLFN11 showed improved progression-free survival (PFS) and overall  
101 survival (OS) when treated with the PARPi veliparib and TMZ [21].

102

103 Determining whether *SLFN11* or the *EWSR1* fusion drives sensitivity to PARPi combinations in  
104 pediatric sarcomas is crucial for identifying patients who might benefit the most from such  
105 treatment. Although SLFN11 is highly expressed in ES, its expression pattern in other pediatric  
106 sarcomas is largely unknown. *SLFN11* mutations are rare, and epigenetic regulation has been  
107 suggested as a mediator of resistance [16, 22]. In this work, we show that SLFN11 is widely  
108 expressed in common pediatric sarcoma subtypes and that the SLFN11 protein, not the presence  
109 of a *EWSR1* fusion, drives sensitivity to TAL and IRN both *in vitro* and *in vivo*. Importantly, we  
110 show that SLFN11 expression does not portend a better prognosis in these patients: in fact, we  
111 reveal an unexpected oncogenic role for the protein. We also show that impairment of intrinsic  
112 apoptosis, not loss of SLFN11 expression, is a primary means of resistance to PARPi combination  
113 therapy in pediatric sarcoma, and that sensitivity to TAL+IRN can be restored by selective  
114 inhibition of BCL-XL. Our work supports the use of combinations involving strong-trapping PARPis  
115 and Topoi1s as targeted therapy for SLFN11-positive pediatric sarcomas, and it offers novel  
116 strategies to combat tumors resistant to replicative stress.

117

118 **RESULTS**

119

## 120 **SLFN11 Expression Is Highly Correlated with Sensitivity to SN-38 and TAL**

121 To determine the extent to which SLFN11 expression is correlated with sensitivity to DDA, we  
122 analyzed the Genomics of Drug Sensitivity in Cancer (GDSC) database which contains more than  
123 1000 cell lines that have been assayed for cell viability 72 h after exposure to hundreds of drugs  
124 [23]. The efficacies of several DDAs, as measured by the area under the curve (AUC), were highly  
125 correlated with SLFN11 expression, with those of the strong-trapping PARPi TAL, and SN-38, the  
126 active metabolite of IRN, showing the highest statistical significance and the largest effect sizes  
127 **(Fig. 1A; Supplementary Table S1A)**. In contrast, the microtubule inhibitors vinorelbine and  
128 vinblastine and the weak-trapping PARPi olaparib showed poor associations. The Pearson  
129 correlation between the mean AUC of SN-38 and TAL was 0.51 ( $P < 0.001$ ), and there was a clear  
130 trend between this average and the increasing quintiles of SLFN11 expression ( $P < 0.001$ , 1-way  
131 ANOVA) **(Fig. 1B; Supplementary Table S1B)**. We observed no correlation between drug  
132 response and those genetic lesions known to impair HR and sensitize tumor cells to both PARPis  
133 and Topo1is, such as BRCA1, BRCA2, and ATM **(Fig. 1C; Supplementary Fig. S1A and S1B;**  
134 **Supplementary Table S1C-S1E)** [24-26]. The short timescale of the GDSC viability assay (72 h)  
135 suggests that SLFN11 induces rapid cytotoxicity, and this phenotype appears to be distinct from  
136 that induced by HR defects.

137

138 We further explored the GDSC database by first defining cell lines within the top quintile of  
139 expression as “SLFN11 High” and all others as “SLFN11 Low” then examining the distribution of  
140 AUCs by tumor subtype **(Fig. 1D)**. The correlation between SLFN11 expression and average SN-

141 38/TAL activity was present in ES, rhabdomyosarcoma (RMS), and osteosarcoma (OST) cell lines,  
142 although sampling was low for the latter 2 tumor types. In contrast, all but 1 neuroblastoma  
143 model expressed low SLFN11, despite 11/24 cell lines (46%) showing a drug response comparable  
144 to that of the highest quintile of SLFN11 expressors. Moreover, there was little difference in the  
145 drug response of high and low SLFN11 expressors in glioma cell lines, suggesting that the  
146 potential for SLFN11 to act as a biomarker predicting sensitivity to SN-38/TAL varies considerably  
147 across tumor types.

148

149 To better understand the relation between SLFN11 levels and DNA repair defects, we calculated  
150 mutational signatures (MS) in tumors from pediatric patients with ES, RMS, and OST (**Fig. 1E and**  
151 **1F; Supplementary Table S1F**), using data from BRCA-deficient and BRCA-wild-type cohorts used  
152 as control [27]. As expected, expression of MS3, a signature associated with HR repair defects,  
153 was highest in the BRCA-deficient group. Consistent with recent reports, OST also showed  
154 elevated expression of this signature [28]. In contrast, ES tumors had MS3 levels comparable to  
155 those in BRCA-wild-type tumors, a finding inconsistent with reports that suggest translocations  
156 involving *EWSR1* induce functional BRCA deficiency. Consistent with previously reported whole-  
157 genome sequencing studies [29, 30], ES tumors have low genomic instability as assessed by the  
158 total number of mutations—an observation incompatible with the presence of HR deficiency.

159

160 Given the high level of SLFN11 expression in ES and the relative scarcity of data on its expression  
161 in other pediatric sarcoma, we developed an immunohistochemistry (IHC) protocol that uses a

162 commercially available antibody to assess protein levels in pediatric sarcomas directly. We  
163 assayed 353 samples from 220 different patients with non-CNS solid tumors who had sufficient  
164 material for staining at St. Jude Children’s Research Hospital (**Fig. 1G; Supplementary Table S1G**  
165 **and S1H**). The patient demographics and diagnosis groups are shown in **Table 1**. SLFN11 had  
166 variable expression, but was nearly universal in ES and DSRCT, with 90% and 100% of those  
167 tumors showing SLFN11 positivity (H-score > 0), respectively. SLFN11 was detected in 75% of the  
168 samples from patients with OST or embryonal RMS (eRMS). Quantification of SLFN11 in the other  
169 tumor types was limited by the small sample sizes. Using H-score at diagnosis, we found the  
170 highest SLFN11 expression in ES, followed by eRMS, OST, and DSRCT (**Fig. 1H**), with a few samples  
171 of the latter 3 tumor types having high expression levels similar to those observed in ES. Overall,  
172 SLFN11 was expressed in 69% of pediatric sarcoma sampled, and 76% of the most common  
173 pediatric sarcomas—a significantly higher percentage than has been implicated in adult tumors  
174 [31].

175

#### 176 **SLFN11, Not *EWSR1* Translocation, Is Required for Sensitivity to SN-38 and TAL *In vitro***

177 To further assess SLFN11 and *EWSR1* translocation as potential drivers of sensitivity to TAL and  
178 SN-38, we profiled 14 sarcoma cell lines that varied by translocation type, p53 status, and  
179 histology, then we assessed SLFN11 expression by IHC, Western blot, and qPCR analysis (**Fig. 2A,**  
180 **Supplementary Table S2A and S2B**). The Pearson correlation between SLFN11 protein and mRNA  
181 levels was 0.64 ( $P = 0.018$ ) (**Supplementary Fig. S2A**). Protein levels were correlated with  
182 sensitivity to single-agent SN-38 and TAL, with Pearson correlations of 0.72 ( $P = 0.003$ ) and 0.74



183 ( $P = 0.003$ ), respectively (**Supplementary Fig. S2B**); and with the mean AUC of the 2 compounds,  
184 with a Pearson correlation of 0.77 ( $P = 0.001$ ) (**Fig. 2B**). We found no association between  
185 sensitivity to these drugs and p53 status ( $P = 0.12$ , *t-test*) (**Supplementary Fig. S2C**). Although  
186 most *EWSR1*-translocated cell lines were more sensitive to drug treatment when compared to  
187 non-translocated cell lines, they also tended to express the highest levels of SLFN11. The  
188 exception was SU-CCS-1, a SLFN11-negative (no protein detected by Western; IHC H-score = 0)  
189 *EWSR1-ATF1*-translocated clear cell sarcoma, suggesting that the *EWSR1* translocation alone was  
190 insufficient to drive drug sensitivity.

191

192 To confirm SLFN11 as the primary driver of sensitivity to these agents, we knocked out the gene  
193 by using CRISPR/Cas9 in our 3 highest-expressing models, generating the isogenic pairs: ES8/ES8-  
194 KO, JN-DSRCT/JN-DSRCT-KO, and A673/A673-KO. We also over-expressed the protein in U2OS  
195 cells, which showed little baseline expression, to create U2OS-OE cells (61% protein relative to  
196 total ES8 by Western); and in ES8-KO cells, to create ES8-KO+OE cells (37% protein relative to  
197 total ES8). Knockout and over-expression were confirmed by Western blot analysis and IHC  
198 (**Supplementary Figure S2D and S2E; Supplementary Table S2A and S2B**). Loss of SLFN11 protein  
199 significantly reduced sensitivity to both SN-38 and TAL in all three knockout lines, whereas over-  
200 expression in U2OS and ES8-KO cells increased drug sensitivity (**Fig. 2C and 2D**). Consistent with  
201 our GDSC analysis, SLFN11 loss had little effect on vincristine sensitivity. Despite expressing a  
202 lower level of the same engineered SLFN11 protein construct, ES8-KO+OE cells had higher AUC  
203 values for SN-38 and TAL when compared to OST U2OS-OE cells (0.40 vs. 0.25 for SN-38 and 0.26  
204 vs. 0.10 for TAL), consistent with the hypothesis that the magnitude of sensitization induced by

205 SLFN11 varies between tumor types (**Supplementary Fig. S2F**). Ionizing radiation is another  
206 means to induce replicative stress [32]. In agreement with our SN-38 and TAL experiments, ES8-  
207 KO and JN-DSRCT-KO were more viable, and U2OS-OE was less viable, compared to their wild-  
208 type counterparts at 72 h after exposure to 4 Gy radiation (**Supplementary Fig. S2G**).

209

210 To further study the effect of SLFN11 KO in our models, we used flow cytometry to compare cell  
211 cycle effects and the degree of cell death induced by “Low” (10 nM SN-38 + 10 nM TAL) and  
212 “High” (1000 nM SN-38 + 1000 nM TAL) dose combinations after 24 h exposure. Based on our  
213 previous pharmacokinetic assessment, “Low” approximates to the upper bound of clinically  
214 relevant concentrations for both drugs, whereas “High” is physiologically unobtainable but useful  
215 for studying mechanism and resistance [6]. Wild-type ES8 cells showed near-complete loss of  
216 viability at both “Low” and “High” doses of the combination, whereas the ability of SN-38+TAL to  
217 induce cell death in ES8-KO cells was significantly diminished, even at high concentrations (**Fig.**  
218 **2E**). A similar decrease in cell viability was observed in JN-DSRCT compared to JN-DSRCT-KO cells,  
219 and the combination was also less cytotoxic in SLFN11-negative SU-CCS-1 cells (**Supplementary**  
220 **Fig. S2H**). SLFN11 selectively induces death in cells arrested in S-phase because of replicative  
221 stress [15]. Consistent with this finding, we observed a significant build-up of S-phase-arrested  
222 ES8-KO cells (**Fig. 2F**).

223

224 Previous studies have shown that SLFN11 is a transcriptional target of EWS-FLI1 [10]. To  
225 determine whether SLFN11 itself contributes to the regulation of EWSR1-FLI1 target genes, we

226 assessed gene expression in ES8 and ES8-KO cells at 4 h and 24 h following exposure to 0 or 2 Gy  
227 of ionizing radiation (baseline and stress conditions). EWSR1-FLI known targets mapped equally  
228 between upregulated and downregulated genes, and we found no enrichment of directional  
229 activation or inhibition of those EWSR1-FLI1 target genes when using Gene Set Enrichment  
230 Analysis (GSEA, FDR > 0.05) (**Fig. 2G; Supplementary Table S2C**). Therefore, although SLFN11 is  
231 regulated by EWS-FLI1, it appears to perturb gene expression independently of the fusion  
232 protein.

233

234 To determine whether SLFN11 influenced the extent of DNA damage induced by SN-38 and TAL,  
235 we performed an alkaline comet tail assay after exposing ES8 and ES8-KO cells to DMSO and the  
236 “High” concentration of SN-38 and TAL for 2 h (**Fig. 2H**). The amount of DNA damage was similar  
237 in both cell lines after drug treatment, indicating that SLFN11 does not enhance the degree of  
238 damage but rather increases the probability of cell death following drug insult. Finally, given the  
239 findings of high levels of R-loops in *EWSR1*-translocated tumors [11], we quantified R-loop  
240 expression in ES8 and ES8-KO cells. Despite a remarkable difference in their response to SN-38  
241 and TAL, we found no significant difference in R-loop levels in the wild-type and SLFN11 KO  
242 models (**Fig. 2I**).

243

#### 244 **SLFN11, Not *EWSR1* Translocation, Is required for Sensitivity to TAL and IRN *In Vivo***

245 To confirm our *in vitro* finding indicating that SLFN11 was an important driver of drug response  
246 in *EWSR1*-translocated tumors, we conducted *in vivo* efficacy studies, as described previously [6],

247 using luciferase-labeled xenografts of ES8, ES8-KO, JN-DSRCT, JN-DSRCT-KO, and SU-CCS-1 cells.  
248 Mice were screened weekly by Xenogen® imaging and enrolled in the study after a target  
249 bioluminescence signal of  $10^7$  photons/s/cm<sup>2</sup> or a palpable tumor was obtained. We used  
250 clinically relevant doses and schedules for all treatment groups tested (**Fig. 3A**) [6] and  
251 administered 4 courses of therapy (21 days/course).

252

253 In ES8 (high SLFN11) xenografts, mice treated with TAL+IRN+TMZ had the best response, with  
254 100% surviving the 84 days of therapy, and 75% experiencing a CR or PR as determined by the  
255 bioluminescence signal (**Fig. 3B and 3C; Supplementary Table S3**). Mice treated with TAL+IRN  
256 survived an average of 60.5 days, with 50% surviving all 4 courses of therapy. In sharp contrast  
257 to mice with wild-type ES8 xenografts, mice with ES8-KO xenografts treated with TAL+IRN and  
258 TAL+IRN+TMZ survived an average of 7.5 days and 23.1 days, respectively, with 100% having  
259 progressive disease (PD) (**Fig. 3D and 3E; Supplementary Table S3**). No mice in any ES8-KO  
260 treatment cohort survived all 4 courses of therapy, although 1 control mouse appeared to have  
261 lost its engraftment signal after 2 weeks and survived the study. Compared to ES8 mice, survival  
262 in ES8-KO mice was significantly lower when treated with either TAL+IRN ( $P < 0.001$ ) or  
263 TAL+IRN+TMZ ( $P < 0.001$ ) (**Fig. 3F**).

264

265 Testing JN-DSRCT (high SLFN11) xenografts *in vivo* was challenging, as these tumors grew slower  
266 and had lower engraftment rates by comparison with ES8 xenografts. Five wild-type mice were  
267 successfully enrolled and treated with either TAL+IRN or TAL+IRN+TMZ, and all experienced a CR

268 by 84 days (**Fig. 3G and 3H; Supplementary Table S3**). One untreated mouse was also enrolled  
269 and maintained stable disease (SD) throughout the 4 courses of therapy. Interestingly, JN-DSRCT-  
270 KO cells engrafted poorly and were unable to be tested. In SU-CCS-1 (no SLFN11) xenografts,  
271 disease stabilized in mice treated with TAL+IRN+TMZ and 90% of the mice had SD or a PR at the  
272 end of therapy (**Fig. 3I**). However, once therapy was stopped, all mice regrew tumors within a  
273 few weeks (**Fig. 3J**). Together, these findings confirm the importance of SLFN11 in driving *in vivo*  
274 sensitivity to combinations involving SN-38 and TAL in *EWSR1*-translocated tumors. The most  
275 striking result was the near complete loss of efficacy in ES8-KO xenografts.

276

277 Finally, we explored efficacy in 143B cells, an aggressive OST cell line (*EWSR1* fusion negative)  
278 with low SLFN11 expression (19% of that in ES8 cells), and observed an intermediate response.  
279 Mice treated with TAL+IRN survived an average of 13.4 days, with 100% having PD  
280 (**Supplementary Fig. S3; Supplementary Table S3**). However, mice treated with TAL+IRN+TMZ  
281 survived much longer, with an average of 77.8 days on study, although none experienced a CR.

282

### 283 **SLFN11 Positivity Is Not Associated With Better Outcomes in Children With Sarcoma**

284 Motivated by the strong evidence that SLFN11 sensitized pediatric sarcomas to PARPi  
285 combination therapy *in vitro* and *in vivo*, we performed a retrospective analysis of the patient  
286 cohort profiled in our IHC study to determine how SLFN11 status changed as therapy progressed  
287 and whether protein levels predicted clinical outcome. Only patients who had a sample available  
288 prior to recurrence or progression were included in the survival analysis (N = 143, **Table 1**). 98.4%

289 of patients were treated with at least one DDA and 66.7% received radiation at some point in  
290 their therapy. This population was more refractory than would be expected historically, with  
291 patients with NRSTS, ES, and eRMS all having OS and event-free survival (EFS) of <50% at 5 years  
292 **(Fig. 4A; Supplementary Fig. S4A).**

293  
294 Loss of SLFN11 expression has been proposed as a mechanism of DDA resistance in adult tumors  
295 [33]. To explore the trend of SLFN11 levels in our cohort, we identified 18 patients with at least  
296 2 IHC measurements spanning different points in treatment **(Fig. 4B; Supplementary Fig. S4B).**  
297 We found no evidence that SLFN11 was silenced over time: 10/18 of patients remained positive  
298 throughout, 3/18 went from being SLFN11 negative to SLFN11 positive, 3/18 went from being  
299 SLFN11 positive to SLFN11 negative, and 2/18 were initially SLFN11 positive then had a negative  
300 sample followed by another positive sample. When including all patients in our IHC study, 37.2%  
301 of those with a sample at diagnosis were positive, compared with 46.2% at progression and 53.7%  
302 at relapse **(Supplementary Table S4A).** We observed no clear trend in the mean values for SLFN11  
303 H-score in samples obtained at diagnosis, relapse, or autopsy.

304  
305 Using receiver-operating characteristic (ROC) analysis, we found that SLFN11 expression as  
306 measured by H-score failed to discriminate patients by EFS, OS, recurrence-free survival (RFS), or  
307 PFS across all tumor types **(Fig. 4C; Supplementary Fig. S4C-S4E),** or within individual disease  
308 cohorts **(Fig. 4D; Supplementary Fig. S4F and S4G).** Surprisingly, SLFN11 positivity was a  
309 statistically significant predictor of *worse* outcome in terms of RFS ( $P = 0.045$ , HR = 1.76 [1.01-

310 3.05]) in univariate analysis (**Supplementary Table S4B**). The metrics OS ( $P = 0.072$ , HR = 1.82  
311 [0.95-3.49]), EFS ( $P = 0.10$ , HR = 1.58 [0.92-2.73]), and PFS ( $P = 0.078$ , HR = 1.72 [0.94-3.13]) were  
312 nonsignificantly associated with poorer outcomes in patients with SLFN11 expressing tumors.  
313 Although statistical significance was not achieved for any metric in multivariate analysis  
314 controlling for age, metastatic status, and disease, the hazard ratio for positivity remained at or  
315 greater than unity (**Fig. 4E; Supplementary Fig. S4H-S4J**). ROC analysis using the H-scores failed  
316 to discriminate patients with metastatic disease (AUC = 0.605). Moreover, neither SLFN11 H-  
317 score nor positivity were statistically significant predictors of metastasis in multivariate analysis  
318 that controlled for diagnosis ( $P = 0.58$  and  $0.35$ , respectively).

319

320 To further interrogate the impact of SLFN11 expression in pediatric sarcoma, we developed and  
321 characterized an orthotopic xenograft model, SJEWS049193\_X1, using a tumor obtained at  
322 autopsy from a patient with metastatic ES treated with multiple salvage regimens, including  
323 treatment on the TAL+IRN+TMZ clinical trial NCT02392793 (**Fig. 4F**). Despite expressing a high  
324 level of SLFN11 (H-score = 285), this tumor failed to respond to TAL+IRN+TMZ *in vivo*, and 100%  
325 of mice showed PD (**Fig. 4G-4I, Supplementary Table S3**). Taken together, our clinical findings  
326 indicated that (a) SLFN11 positivity is common in pediatric sarcoma; (b) pediatric sarcomas do  
327 not acquire DDA resistance via *SLFN11* silencing; and (c) SLFN11 positivity does not predict  
328 improved patient outcomes, and might, in fact, do the opposite. These results suggest an  
329 oncogenic role for SLFN11 in these tumors.

330

331 **SLFN11 Knockout Induces Widespread Transcriptional Changes in Models of ES and DSRCT**

332 To investigate the effect of SLFN11 beyond its role as a sensitizer to DNA damage, we expanded  
333 the microarray study described earlier to include JN-DSRCT and JN-DSRCT-KO cells (**Fig. 5A**). After  
334 controlling for cell of origin, 4960/21148 of the genes studied (23%) were differentially expressed  
335 in ES8 and JN-DSRCT upon SLFN11 loss (ANOVA FDR < 0.05). GSEA using the MsigDB Hallmark  
336 sets [34] revealed significant upregulation of genes involved in “Interferon Alpha Response”,  
337 “Interferon Gamma Response”, and “TNFA Signaling via NFKB”; and downregulation of genes  
338 enriched in “E2F targets” and “G2M Checkpoint” (FDR q-value < 0.001, **Fig. 5B; Supplementary**  
339 **Fig. S5A**) in SLFN11-KO cells. Ingenuity Pathway Analysis (IPA) [35], based on differentially  
340 expressed genes showing concordant change greater than 0.2 log in both cell backgrounds,  
341 confirmed “Interferon Signaling” activation in SLFN11-KO cells. The top regulator effect identified  
342 by IPA was enhanced “Quantity of MHC Class I on cell surface” in SLFN11-KO cells (**Fig. 5C**). This  
343 expression study suggests that loss of SLFN11 decreases proliferation and reduces evasion of the  
344 host innate immune response in these models.

345

346 The most upregulated gene in SLFN11-KO cells was that encoding arginase succinate synthetase  
347 1 (*ASS1*), an enzyme involved in the arginine biosynthetic pathway (**Fig. 5D**). Others have shown  
348 that tumor cells repress the *ASS1* gene to bypass the urea cycle and increase cytosolic aspartate  
349 levels, thereby stimulating pyrimidine biosynthesis and promoting cancer proliferation [36, 37].  
350 *ASS1* deficiency is common in sarcomas, and renders them vulnerable to depletion of arginine  
351 from their environment via pegylated arginine deiminase (ADI-PEG 20) [38, 39]. To test whether  
352 changes in *ASS1* expression had functional consequences, we treated ES8 and JN-DSRCT wild-  
353 type and SLFN11-KO cells with ADI-PEG 20 in a dose-response experiment and then evaluated



354 cell viability with the CellTiter-Glo (CTG) assay. Consistent with our expression study, wild-type  
355 cells were more sensitive to arginine depletion than were SLFN11-KO cells (**Fig. 5E**).

356

357 To determine whether the presence of SLFN11 conferred a general growth advantage to sarcoma  
358 cells, we measured the growth rate of wild-type and SLFN11-KO cells in culture. We observed  
359 decreases of 9%, 17%, and 27% in the growth rates for KO cells compared to wild-type ES8, JN-  
360 DSRCT, and A673 cells, respectively; and an increase of 7% for U2OS-OE cells compared with  
361 U2OS cells (**Figure 5F; Supplementary Fig. S5B**). *In vivo*, ES8 and ES8-KO models maintained the  
362 aggressive growth observed *in vitro* and we were unable to detect a difference in survival  
363 between untreated mice from these two groups ( $P = 0.316$ ) (**Supplementary Table S3**). Strikingly,  
364 SLFN11 deletion caused a complete loss of the ability of JN-DSCRCT-KO cells to form tumors in our  
365 xenograft models, despite multiple attempts to optimize conditions both intraperitoneally and  
366 subcutaneously (**Fig. 5G**).

367

### 368 **Mechanisms of Resistance to SN-38 and TAL in SLFN11-Expressing Pediatric Sarcomas**

369 The lack of SLFN11 silencing in the pediatric sarcoma population led us to seek alternative  
370 mechanisms of resistance in cell lines with high levels of SLFN11 expression. Unfortunately,  
371 SJEWS049193\_X1, the resistant ES model described earlier, was not amenable to prolonged cell  
372 culture and *in vitro* investigation. Therefore, we mined the GDSC database to identify the  
373 sarcoma cell lines with the highest levels of SLFN11 expression that were refractory (having less  
374 than the median activity observed in the GDSC) to both SN-38 and TAL. We identified 3 lines of

375 interest: EW-13, EW-18, and EW-24 (**Supplementary Fig. S6A**, bottom-left quadrant). These lines  
376 showed broad resistance to oncology drugs, including vincristine, when compared to sensitive ES  
377 models with high SLFN11 expression (**Fig. 6A; Supplementary Table S6A**). We obtained EW-13  
378 and EW-18, as well as EW-11 which showed intermediate sensitivity in the database. Separately,  
379 we acquired CHLA258, which was reported to be less sensitive to Topo1is [40]. We confirmed  
380 drug resistance with CTG assays and flow cytometry (**Fig. 6B; Supplementary Fig. S6B**). Western  
381 blot analysis indicated strong SLFN11 expression, with bands of appropriate size, in EW-11, EW-  
382 13, and CHLA258; however, protein expression in EW-18 was weaker and the band migration  
383 corresponded to a lower molecular weight (**Fig. 6C; Supplementary Fig. S6C**). Cross-referencing  
384 with the COSMIC database (<https://cancer.sanger.ac.uk/cosmic>) revealed that the *SLFN11* gene  
385 in EW-18 had a frameshift mutation, c.1928\_1929insA, which resulted in a C-terminal truncation  
386 that was predicted to limit nuclear localization and, therefore, reduce DDA sensitization [14].  
387 Indeed, IHC confirmed that SLFN11 was predominantly expressed in the cytoplasm, and  
388 consequently, the cell line was assigned an H-score of 0 (**Fig. 6D; Supplementary Fig. S6D**). It is  
389 important to note that, as far we are aware, all commercially available antibodies target the N-  
390 terminus of SLFN11 and could fail to detect C-terminal truncations unless a distinction is made  
391 between nuclear and cytoplasmic staining as we did in this study.

392

393 Although the *SLFN11* mutation in EW-18 could explain its weak response to DDAs, our analysis of  
394 the GDSC and COSMIC databases indicated that the frequency of *SLFN11* mutation in the  
395 resistant population was low, with 18/22 cell lines (82%) having a wild-type sequence. We chose  
396 *SLFN11*-wild-type CHLA258 for further investigation. We confirmed strong nuclear expression of

397 the protein by IHC (H-score = 225) (**Fig. 6D**). Consistent with the other tumor lines, SN-38+TAL  
398 induced a high level of DNA damage as assessed by the alkaline comet-tail assay (**Fig. 6E**). R-loop  
399 expression was comparable to that observed in ES8 and ES8-KO cells (**Fig. 6F**). The “Low”  
400 combination of SN-38 and TAL did not substantially increase apoptosis but instead induced a  
401 build-up of S-phase cells similar to that observed with ES8-KO cells (**Supplementary Fig. 6SE**).  
402 However, the S-phase population was depleted by the “High” concentration.

403

404 Overlaying the SN-38 dose-response curves for the ES8, ES8-KO and resistant cell lines revealed  
405 2 distinct phenotypes (**Fig. 6G**). The dose-response curves for EW-11, EW-13, CHLA258, and A673  
406 (the least sensitive ES cell line in our original panel) showed an inflection at concentrations of <10  
407 nM, as seen with ES8 cells, but did not show the same level of maximum efficacy (percentage  
408 inhibition of viability). Consistent with the lack of SLFN11 nuclear localization, EW-18 behaved  
409 more like the ES8-KO cells. The efficacy of TAL was substantially less in all cell lines, and its  
410 potency was 2 to 6-fold within that in ES8 cells. The exceptions to this were EW-13, in which TAL  
411 was more potent than in ES8 cells, and EW-18, in which TAL was inactive (**Supplementary Fig.**  
412 **S6F**).

413

414 To probe the mechanism of cytotoxicity induced by TAL and SN-38, we treated ES8 cells exposed  
415 to each drug with the caspase inhibitor Z-VAD-FMK, and discovered a significant reduction in  
416 efficacy suggesting that apoptosis was the primary mode of cell death with this drug combination  
417 (data not shown). To investigate the role of the intrinsic apoptosis pathway in mediating drug

418 sensitivity, we knocked out BAX, BAK, and both BAX and BAK in ES8 cells. The potency of SN-38  
419 and TAL in BAX and BAX/BAK KO cells remained within 2-fold of that in wild-type ES8 cells, but  
420 their efficacy was significantly reduced—a phenotype similar to that observed in EW-11, EW-13,  
421 CHLA258, and A673 (**Fig. 6H**). BAX deletion alone reduced sensitivity to the DDAs doxorubicin and  
422 etoposide to levels comparable to those in ES8-KO cells, but the deletion also reduced sensitivity  
423 to vincristine—a phenotype distinct from that of SLFN11 KO cells and comparable to that  
424 observed in the resistant ES cell lines described earlier (**Fig. 6I**).

425  
426 During this project, it was reported that resistance to the PARPi olaparib in ES cell lines could be  
427 overcome with the pan-BCL2 inhibitor navitoclax [41]. Motivated by that work and by our own  
428 findings, we screened small molecules inhibitors that were selective for individual BCL2 family  
429 members: venetoclax (BCL2), S63845 (MCL), and A-1331852 (BCL-XL). BCL-XL inhibition alone  
430 sensitized sarcoma cells to the combination of SN-38 and TAL (**Fig. 6J**). Addition of A-1331852  
431 decreased cell viability in A673 and CHLA-258 by a factor of 5.2- and 7.9, respectively, relative to  
432 that with the “Low” concentration alone. Although BCL-XL inhibition enhanced the efficacy of the  
433 combination in SLFN11-negative U2OS cells, the change in U2OS-OE cells was significantly greater  
434 (a 7.5-fold increase vs. a 2.8-fold increase).

435  
436 These mechanistic studies suggest that (a) impairment of the intrinsic apoptotic pathway, rather  
437 than reduced SLFN11 expression, constitutes a primary means of resistance to TAL and SN-38 in

438 pediatric sarcomas; and (b) selective inhibition of BCL-XL can restore sensitivity to the drug  
439 combination in SLFN11 expressing resistant tumors.

440

## 441 **DISCUSSION**

442 The heterogeneous and aggressive nature of pediatric sarcomas makes it imperative to identify  
443 biomarkers for drug response and new therapeutic targets. Preliminary results from the phase I  
444 clinical trial NCT02392793 showed that the combination of TAL and IRN was tolerable and yielded  
445 encouraging results in several patients with sarcoma. In a phase I/II trial, TAL+TMZ was also well  
446 tolerated; however, no tumor response was seen in the 10 patients with ES treated on that trial,  
447 although 2 had prolonged SD [42]. Here, we have shown that SLFN11, not *EWSR1*-fusion or  
448 functional BRCA deficiency, is a significant driver of sensitivity to TAL and IRN in this population.

449

450 Using IHC, we found that SLFN11 was widely expressed in our cohort of patients with pediatric  
451 sarcomas, with H-scores reaching near maximum in some samples. The sensitivity to TAL and SN-  
452 38 in sarcoma cell lines correlated with protein levels both *in vitro* and *in vivo* and was  
453 independent of the *EWSR1* translocation. However, despite the strong link between protein  
454 expression and DDA sensitivity in our preclinical studies, we found no association between  
455 SLFN11 status and improved outcome in a retrospective analysis of our patient cohort. Moreover,  
456 we found no evidence that SLFN11 was silenced in recurrent disease. These findings contradict  
457 recent reports indicating that certain SLFN11-positive tumors have better outcomes with DDA  
458 therapy and that gene silencing is a principal route to DDA resistance.

459

460 The contrast between our findings and studies in other tumor backgrounds could be attributed  
461 to the unique role that SLFN11 plays in pediatric sarcomas. SLFN11 KO in sarcoma cells induced  
462 significant changes in transcription, including upregulation of interferon signaling and MHC Class  
463 I antigen presentation, and downregulation of genes required for cellular proliferation and  
464 oncogenic metabolism. SLFN11-wild-type cells were more sensitive than SLFN11 KO cells to  
465 arginine depletion using ADI-PEG-20, confirming the functional consequence of our finding that  
466 SLFN11 deletion increased levels of ASS1, the rate-limiting factor in arginine biosynthesis.  
467 Moreover, SLFN11 expressing cells grew faster in cell culture, and JN-DSRCT cells engrafted better  
468 in orthotopic xenograft models compared to JN-DSCRT-KO cells.

469

470 Importantly, we identified sarcoma models expressing high levels of SLFN11 that were resistant  
471 to TAL and SN-38. With the exception of EW-18, in which the *SLFN11* gene was truncated, these  
472 tumor cell lines expressed wild-type protein as determined by Western blot analysis, sequence  
473 analysis, and nuclear localization. We saw no changes in R-loop levels or in the extent of drug-  
474 induced DNA damage. These resistant models compensate for the DDA vulnerability induced by  
475 SLFN11 expression by attenuating intrinsic apoptosis. Selective inhibition of BCL-XL increased the  
476 cytotoxicity of the combination of TAL and SN-38 in resistant ES cell lines, and resulted in  
477 enhanced drug efficacy in OST U2OS cells engineered to over-express SLFN11.

478

479 Our retrospective analysis of SLFN11 and outcome in pediatric sarcoma was clearly limited.  
480 Although most patients received at least 1 DDA, the treatment modalities and disease types  
481 varied widely. Moreover, our population appeared to be more refractory to therapy than what  
482 would be expected, likely owing to the categories of patients treated at our institution.  
483 Consequently, our work strongly supports the prospective evaluation of SLFN11 as a biomarker  
484 predicting the response to PARPi and Topo1i combinations in newly diagnosed pediatric  
485 sarcomas, which are less likely to have developed widespread chemo-resistance. The ability to  
486 rescue tumors by selective BCL-XL inhibition warrants further investigation of strategies that  
487 target both replicative stress and the intrinsic apoptotic pathway. Finally, enhanced ASS1  
488 deficiency in SLFN11-positive sarcomas may render them more susceptible to arginine depletion  
489 strategies. Ultimately, our work provides a framework to develop rational, targeted combination  
490 therapy approaches for both treatment naïve and refractory SLFN11-positive pediatric sarcoma.

491

## 492 **METHODS**

### 493 ***Genomics of Drug Sensitivity in Cancer (GDSC) Correlations***

494 Drug sensitivity (v17.3) and expression data were downloaded from the GDSC website  
495 ([https://www.cancerrxgene.org/gdsc1000/GDSC1000\\_WebResources/Home.html](https://www.cancerrxgene.org/gdsc1000/GDSC1000_WebResources/Home.html)) in May 2018  
496 and June 2018, respectively. COSMIC mutation data (CosmicMutantExport.tsv.gz) was  
497 downloaded from <https://cancer.sanger.ac.uk/cosmic/download> in March 2020.

498

499 ***Mutational Signatures***

500 The set of 30 mutational signatures, a 96 x 30 matrix Z, were obtained from COSMIC  
501 (<https://cancer.sanger.ac.uk/cosmic/signatures>). Details of the fitting procedure are provided in  
502 Supplemental Data.

503

504 ***Immunohistochemical staining of pediatric tumor samples***

505 Immunohistochemistry was performed with the Dako Omnis instrument (Agilent) on 4- $\mu$ m-thick  
506 formalin-fixed paraffin-embedded whole-tissue sections, using a rabbit anti-SLFN11 (anti-  
507 Schlafen family member 11) polyclonal antibody (Sigma-Aldrich Cat# HPA023030,  
508 RRID:AB\_1856613) (1:25 dilution, 60 min incubation), Dako Low pH Target Retrieval Solution, and  
509 the Dako EnVision Flex Detection Kit. Immunoreactivity was scored using H-scores as described  
510 in Supplemental Data.

511

512 ***Cell culture and viability assays***

513 Description, sourcing, and culture conditions for the sarcoma cell lines used in this work are  
514 reported in **Supplementary Table S2A**. Cell lines were authenticated using short tandem repeat  
515 analysis via PowerPlex (Promega), and tested for mycoplasma using MycoAlert (Lonza).  
516 Translocation status was confirmed using PCR and Fluorescence In Situ Hybridization (FISH). Cell  
517 viability was assessed using the CellTiter-Glo (CTG) assay (Promega). ADI-PED 20 was provided by  
518 Polaris Pharmaceuticals (San Diego, CA). Cell line characterization by Western Blot and qPCR  
519 analysis is described in Supplemental Data.



520

521 ***Cell Engineering***

522 SLFN11 cDNA (OriGene Technologies Cat# RC226247L4) and the pVector control vector (OriGene  
523 Technologies Cat# PS100093) were used to generate the ES8-KO+OE, U2OS-OE, and U2OS-PV  
524 models, respectively. hSLFN11<sup>-/-</sup> cells were generated using CRISPR-Cas9 technology.

525

526 ***Comet Assay***

527 Alkaline single cell electrophoresis was performed using the CometAssay Reagent kit (Trevigen  
528 Cat# 4250-050) in accordance with the manufacturer's instructions. Comets were imaged by  
529 using the LionHeart FX automated microscope (Biotek) and the Gen5 Image Prime software to  
530 construct image montages that were analyzed using TriTek CometScore 2.0.0.38.

531

532 ***R-Loop Immunofluorescence***

533 R-loops were quantified based on the total nuclear intensity of the S9.6 antibody (Kerafast Cat#  
534 ENH001, RRID:AB\_2687463). Cells were imaged with a Leica microscope using 40x and 63x  
535 objectives. Images were acquired using the Photon Counting 3D Nyquist technique.

536

537 ***Expression Analysis by Microarray***

538 Expression profiles were generated from biological triplicates of wild-type and SLFN11-null cells  
539 from two parental cell lines (ES8, JNDS). Cells were treated with 0 or 2 Gy of gamma irradiation

540 then harvested at 4 h or 24 h post-irradiation. Total RNA (100 ng) was purified from treated cells  
541 with a RNeasy Mini Kit (Qiagen Cat# 74104) and analyzed using the Affymetrix Clariom S Human  
542 assay (ThermoFisher Scientific Cat# 902927).

543

#### 544 ***Patient Correlations***

545 The St. Jude electronic database was surveyed for solid tumor patients enrolled on St. Jude trials  
546 from 2000 to 2018 to identify potential samples. Samples were assessed for viability and  
547 availability. Once staining was performed, a retrospective review of the electronic medical record  
548 was conducted. Patient data were matched with the IHC samples, and the results were analyzed  
549 for correlation by an independent statistician.

550

#### 551 ***In Vivo Experiments***

552 Athymic nude immunodeficient mice were purchased from Charles River (strain code 553). This  
553 study was carried out in strict accordance with the recommendations in the Guide to Care and  
554 Use of Laboratory Animals of the National Institute of Health. The protocol was approved by the  
555 Institutional Animal Care and Use Committee at St. Jude Children's Research Hospital. Drug  
556 dosing and efficacy studies were performed as described previously [6].

557

558

## 559 **Acknowledgements**

560 The authors thank Keith A. Laycock, PhD, ELS, for scientific editing of the manuscript. We thank  
561 Dr. Richard Ashmun and the Flow Cytometry and Cell Sorting Shared Resource at St. Jude for  
562 expert guidance, and the Childhood Solid Tumor Network (<http://www.stjude.org/CSTN/>) for  
563 providing xenograft models. Preclinical imaging was performed with help from the Center for In  
564 Vivo Therapeutics at St. Jude. Cell images were acquired at the Cell and Tissue Imaging Center,  
565 cytogenetics were performed by the Cytogenetic Shared Resource, and microarray data were  
566 generated at the Hartwell Center for Bioinformatics and Biotechnology, all of which are  
567 supported by St. Jude and by the National Cancer Institute grant P30 CA021765. Additionally, this  
568 work was supported by the American Lebanese Syrian Associated Charities (AS, E.A.S.). E.A.S.  
569 was supported by the National Comprehensive Cancer Network and is a St. Baldrick's Scholar  
570 with generous support from the Invictus Fund. A.A.S. was supported by the Sarcoma Foundation  
571 of America and the St. Baldrick's Foundation. The content of this paper is solely the responsibility  
572 of the authors and does not necessarily represent the official views of the National Institutes of  
573 Health.

574

## 575 References

- 576 1. Pappo, A.S. and U. Dirksen, *Rhabdomyosarcoma, Ewing Sarcoma, and Other Round Cell*  
577 *Sarcomas*. J Clin Oncol, 2018. **36**(2): p. 168-179.
- 578 2. Womer, R.B., et al., *Randomized controlled trial of interval-compressed chemotherapy for the*  
579 *treatment of localized Ewing sarcoma: a report from the Children's Oncology Group*. J Clin Oncol,  
580 2012. **30**(33): p. 4148-54.
- 581 3. Skapek, S.X., et al., *Rhabdomyosarcoma*. Nat Rev Dis Primers, 2019. **5**(1): p. 1.
- 582 4. Spunt, S.L., et al., *A risk-based treatment strategy for non-rhabdomyosarcoma soft-tissue*  
583 *sarcomas in patients younger than 30 years (ARST0332): a Children's Oncology Group*  
584 *prospective study*. Lancet Oncol, 2020. **21**(1): p. 145-161.
- 585 5. Kager, L., G. Tamamyran, and S. Bielack, *Novel insights and therapeutic interventions for pediatric*  
586 *osteosarcoma*. Future Oncol, 2017. **13**(4): p. 357-368.
- 587 6. Stewart, E., et al., *Targeting the DNA repair pathway in Ewing sarcoma*. Cell Rep, 2014. **9**(3): p.  
588 829-41.
- 589 7. Federico, S., *A phase I trial of talazoparib and irinotecan with and without temozolomide in*  
590 *children and young adults with recurrent or refractory solid malignancies*. European Journal of  
591 Cancer, 2020. *In Press*.
- 592 8. Brenner, J.C., et al., *PARP-1 inhibition as a targeted strategy to treat Ewing's sarcoma*. Cancer  
593 Res, 2012. **72**(7): p. 1608-13.
- 594 9. Murai, J., et al., *Trapping of PARP1 and PARP2 by Clinical PARP Inhibitors*. Cancer Res, 2012.  
595 **72**(21): p. 5588-99.
- 596 10. Tang, S.W., et al., *SLFN11 Is a Transcriptional Target of EWS-FLI1 and a Determinant of Drug*  
597 *Response in Ewing Sarcoma*. Clin Cancer Res, 2015. **21**(18): p. 4184-93.
- 598 11. Gorthi, A., et al., *EWS-FLI1 increases transcription to cause R-loops and block BRCA1 repair in*  
599 *Ewing sarcoma*. Nature, 2018. **555**(7696): p. 387-391.
- 600 12. Choy, E., et al., *Phase II study of olaparib in patients with refractory Ewing sarcoma following*  
601 *failure of standard chemotherapy*. BMC Cancer, 2014. **14**: p. 813.
- 602 13. Ballestrero, A., et al., *Report on the first SLFN11 monothematic workshop: from function to role*  
603 *as a biomarker in cancer*. J Transl Med, 2017. **15**(1): p. 199.
- 604 14. Mu, Y., et al., *SLFN11 inhibits checkpoint maintenance and homologous recombination repair*.  
605 EMBO Rep, 2016. **17**(1): p. 94-109.
- 606 15. Murai, J., et al., *SLFN11 Blocks Stressed Replication Forks Independently of ATR*. Mol Cell, 2018.  
607 **69**(3): p. 371-384.e6.
- 608 16. Thomas, A. and Y. Pommier, *Targeting Topoisomerase I in the Era of Precision Medicine*. Clin  
609 Cancer Res, 2019. **25**(22): p. 6581-6589.
- 610 17. Murai, J., et al., *Rationale for poly(ADP-ribose) polymerase (PARP) inhibitors in combination*  
611 *therapy with camptothecins or temozolomide based on PARP trapping versus catalytic inhibition*.  
612 J Pharmacol Exp Ther, 2014. **349**(3): p. 408-16.
- 613 18. Zoppoli, G., et al., *Putative DNA/RNA helicase Schlafen-11 (SLFN11) sensitizes cancer cells to*  
614 *DNA-damaging agents*. Proc Natl Acad Sci U S A, 2012. **109**(37): p. 15030-5.
- 615 19. Coussy, F., et al., *BRCAness, SLFN11, and RB1 loss predict response to topoisomerase I inhibitors*  
616 *in triple-negative breast cancers*. Sci Transl Med, 2020. **12**(531).
- 617 20. Conteduca, V., et al., *SLFN11 Expression in Advanced Prostate Cancer and Response to Platinum-*  
618 *based Chemotherapy*. Mol Cancer Ther, 2020. **19**(5): p. 1157-1164.

- 619 21. Pietanza, M.C., et al., *Randomized, Double-Blind, Phase II Study of Temozolomide in Combination*  
620 *With Either Veliparib or Placebo in Patients With Relapsed-Sensitive or Refractory Small-Cell*  
621 *Lung Cancer*. J Clin Oncol, 2018. **36**(23): p. 2386-2394.
- 622 22. Gardner, E.E., et al., *Chemosensitive Relapse in Small Cell Lung Cancer Proceeds through an*  
623 *EZH2-SLFN11 Axis*. Cancer Cell, 2017. **31**(2): p. 286-299.
- 624 23. Garnett, M.J., et al., *Systematic identification of genomic markers of drug sensitivity in cancer*  
625 *cells*. Nature, 2012. **483**(7391): p. 570-5.
- 626 24. Maede, Y., et al., *Differential and common DNA repair pathways for topoisomerase I- and II-*  
627 *targeted drugs in a genetic DT40 repair cell screen panel*. Mol Cancer Ther, 2014. **13**(1): p. 214-  
628 20.
- 629 25. Bryant, H.E., et al., *Specific killing of BRCA2-deficient tumours with inhibitors of poly(ADP-ribose)*  
630 *polymerase*. Nature, 2005. **434**(7035): p. 913-7.
- 631 26. Keung, M.Y.T., Y. Wu, and J.V. Vadgama, *PARP Inhibitors as a Therapeutic Agent for Homologous*  
632 *Recombination Deficiency in Breast Cancers*. J Clin Med, 2019. **8**(4).
- 633 27. Davies, H., et al., *HRDetect is a predictor of BRCA1 and BRCA2 deficiency based on mutational*  
634 *signatures*. Nat Med, 2017. **23**(4): p. 517-525.
- 635 28. Kovac, M., et al., *Exome sequencing of osteosarcoma reveals mutation signatures reminiscent of*  
636 *BRCA deficiency*. Nat Commun, 2015. **6**: p. 8940.
- 637 29. Tirode, F., et al., *Genomic landscape of Ewing sarcoma defines an aggressive subtype with co-*  
638 *association of STAG2 and TP53 mutations*. Cancer Discov, 2014. **4**(11): p. 1342-53.
- 639 30. Crompton, B.D., et al., *The genomic landscape of pediatric Ewing sarcoma*. Cancer Discov, 2014.  
640 **4**(11): p. 1326-41.
- 641 31. Murai, J., et al., *Schlafen 11 (SLFN11), a restriction factor for replicative stress induced by DNA-*  
642 *targeting anti-cancer therapies*. Pharmacol Ther, 2019. **201**: p. 94-102.
- 643 32. Zhang, J., et al., *Targeting DNA Replication Stress for Cancer Therapy*. Genes (Basel), 2016. **7**(8).
- 644 33. Thomas, A. and Y. Pommier, *Targeting Topoisomerase I in the Era of Precision Medicine*. Clin  
645 Cancer Res, 2019.
- 646 34. Subramanian, A., et al., *Gene set enrichment analysis: a knowledge-based approach for*  
647 *interpreting genome-wide expression profiles*. Proc Natl Acad Sci U S A, 2005. **102**(43): p. 15545-  
648 50.
- 649 35. Krämer, A., et al., *Causal analysis approaches in Ingenuity Pathway Analysis*. Bioinformatics,  
650 2014. **30**(4): p. 523-30.
- 651 36. Rabinovich, S., et al., *Diversion of aspartate in ASS1-deficient tumours fosters de novo pyrimidine*  
652 *synthesis*. Nature, 2015. **527**(7578): p. 379-383.
- 653 37. Keshet, R., et al., *Rewiring urea cycle metabolism in cancer to support anabolism*. Nat Rev  
654 Cancer, 2018. **18**(10): p. 634-645.
- 655 38. Bean, G.R., et al., *A metabolic synthetic lethal strategy with arginine deprivation and chloroquine*  
656 *leads to cell death in ASS1-deficient sarcomas*. Cell Death Dis, 2016. **7**(10): p. e2406.
- 657 39. Kremer, J.C., et al., *Arginine Deprivation Inhibits the Warburg Effect and Upregulates Glutamine*  
658 *Anaplerosis and Serine Biosynthesis in ASS1-Deficient Cancers*. Cell Rep, 2017. **18**(4): p. 991-  
659 1004.
- 660 40. May, W.A., et al., *Characterization and drug resistance patterns of Ewing's sarcoma family tumor*  
661 *cell lines*. PLoS One, 2013. **8**(12): p. e80060.
- 662 41. Heisey, D.A.R., et al., *The Ewing Family of Tumors Relies on BCL-2 and BCL-XL to Escape PARP*  
663 *Inhibitor Toxicity*. Clin Cancer Res, 2019. **25**(5): p. 1664-1675.
- 664 42. Schafer, E.S., et al., *Phase 1/2 trial of talazoparib in combination with temozolomide in children*  
665 *and adolescents with refractory/recurrent solid tumors including Ewing sarcoma: A Children's*

666            *Oncology Group Phase 1 Consortium study (ADVL1411)*. *Pediatr Blood Cancer*, 2020. **67**(2): p.  
667            e28073.

668

669

|                           | All, N=220 (%)   | Survival Studies, N=143(%) |
|---------------------------|------------------|----------------------------|
| <b>Age (years)</b>        |                  |                            |
| N                         | 185              | 135                        |
| Mean $\pm$ SD             | 9.2 $\pm$ 6.1    | 9.0 $\pm$ 6.4              |
| Median (min - max)        | 9.6 (0.3 - 23.5) | 8.8 (0.3 - 23.5)           |
| <b>Sex</b>                |                  |                            |
| Female                    | 82 (44.3)        | 63 (46.7)                  |
| Male                      | 103 (55.7)       | 72 (53.3)                  |
| NA/missing                | 35               | 8                          |
| <b>Race</b>               |                  |                            |
| White                     | 129 (74.1)       | 91 (71.7)                  |
| Black                     | 34 (19.5)        | 26 (20.5)                  |
| Other                     | 11 (6.3)         | 10 (7.9)                   |
| NA/missing                | 46               | 16                         |
| <b>Ethnicity</b>          |                  |                            |
| Non-Hispanic              | 123 (87.2)       | 97 (88.2)                  |
| Hispanic                  | 18 (12.8)        | 13 (11.8)                  |
| NA/missing                | 79               | 33                         |
| <b>Metastatic Disease</b> |                  |                            |
| No                        | 68 (40.2)        | 43 (34.1)                  |
| Yes                       | 101 (59.8)       | 83 (65.9)                  |
| NA/missing                | 51               | 17                         |
| <b>Chemotherapy</b>       |                  |                            |
| No                        | 3 (1.7)          | 2 (1.6)                    |
| Yes                       | 171 (98.3)       | 124 (98.4)                 |
| NA/missing                | 46               | 17                         |
| <b>Radiation</b>          |                  |                            |
| No                        | 64 (36.8)        | 42 (33.3)                  |
| Yes                       | 110 (63.2)       | 84 (66.7)                  |
| NA/missing                | 46               | 17                         |
| <b>Surgery</b>            |                  |                            |
| No                        | 32 (18.4)        | 20 (15.9)                  |
| Yes                       | 142 (81.6)       | 106 (84.1)                 |
| NA/missing                | 46               | 17                         |
| <b>Transplantation</b>    |                  |                            |
| No                        | 127 (73.8)       | 84 (67.2)                  |
| Yes                       | 45 (26.2)        | 41 (32.8)                  |
| NA/missing                | 48               | 18                         |
| <b>Diagnosis Group</b>    |                  |                            |
| DSRCT                     | 7 (3.2)          | 5 (3.5)                    |
| aRMS                      | 8 (3.6)          | 5 (3.5)                    |
| oRMS                      | 1 (0.5)          | 5 (3.5)                    |
| eRMS                      | 12 (5.5)         | 20 (14.0)                  |
| OS                        | 55 (25.0)        | 42 (29.4)                  |
| NB                        | 44 (20.0)        | 34 (23.8)                  |
| ES                        | 48 (21.8)        | 13 (9.1)                   |
| NRSTS                     | 19 (8.6)         | 19 (13.3)                  |
| sNOS                      | 26 (11.8)        | 5 (3.5)                    |

670

671 **Table 1. Demographics of the pediatric cohort.**

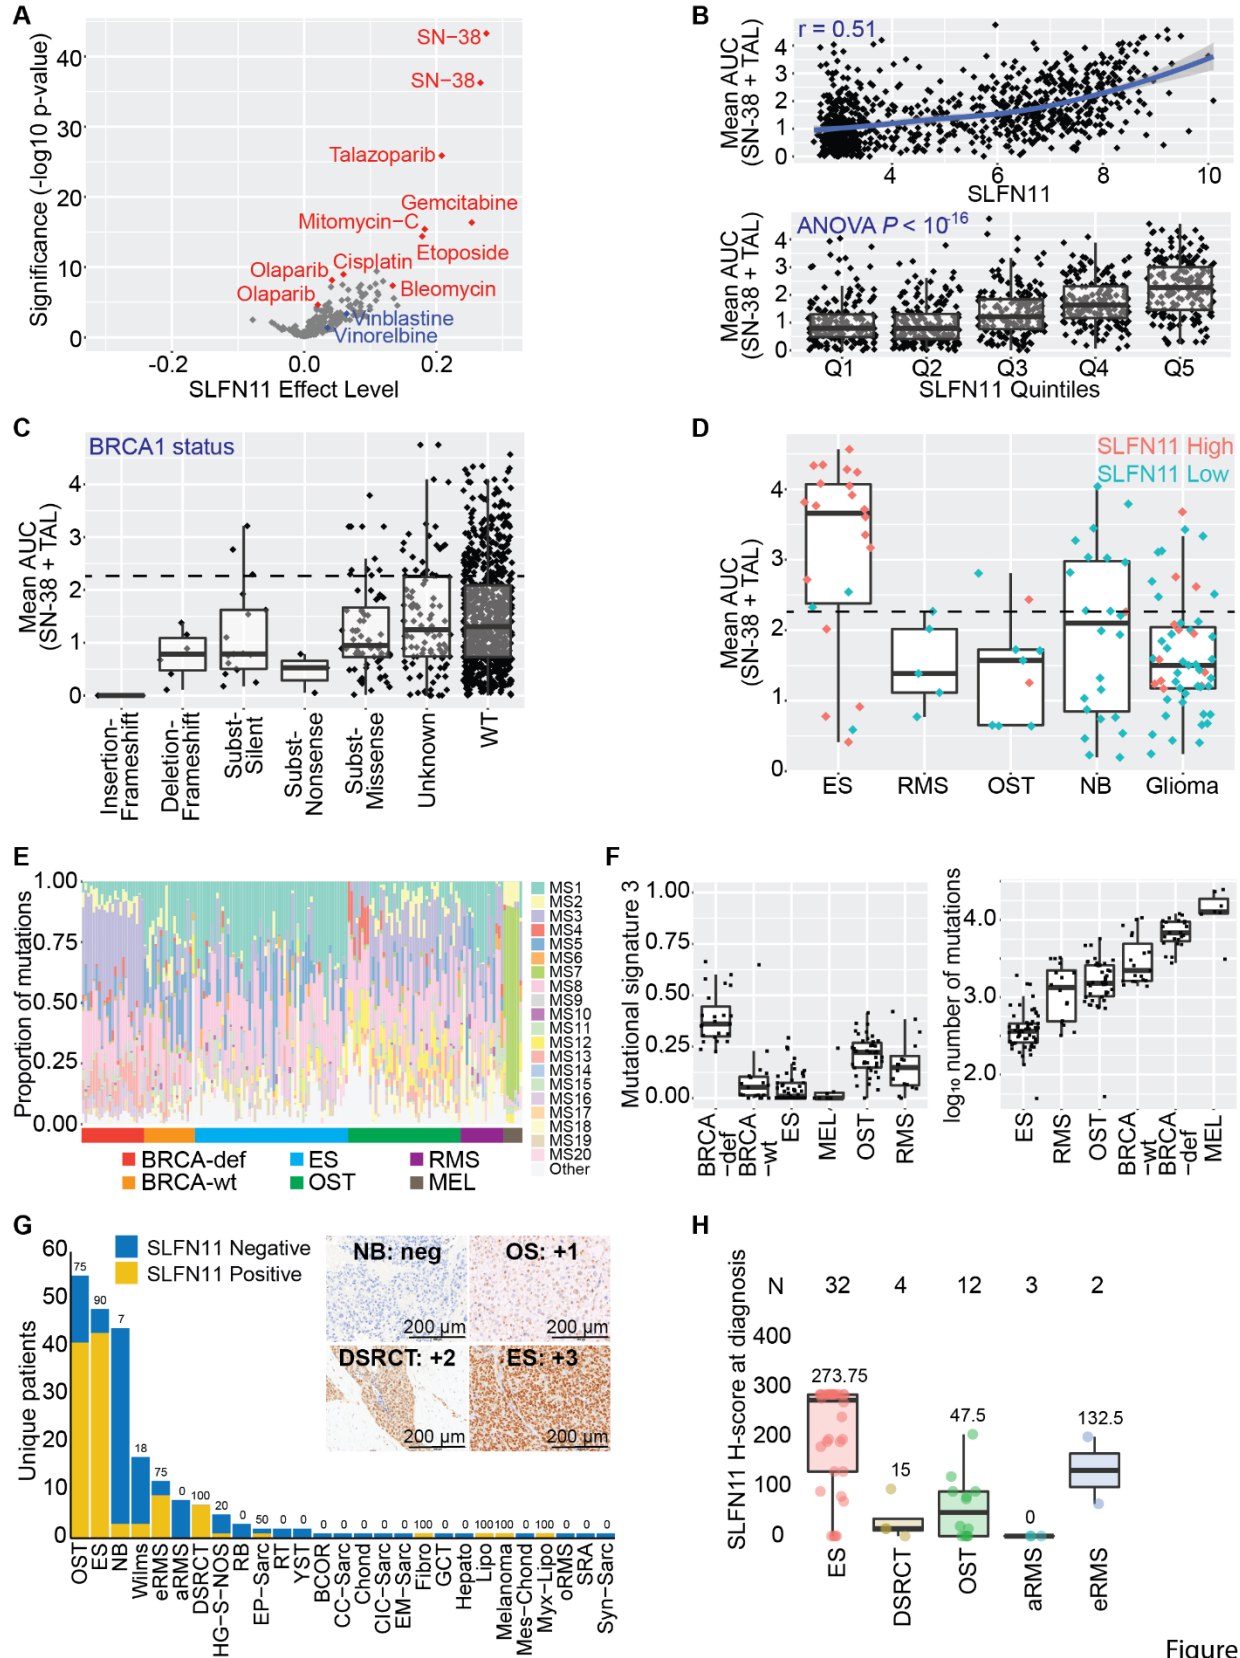

Figure 1



673 **Figure 1. SLFN11 was highly correlated with the efficacy of SN-38 and TAL, and was widely**  
674 **expressed in pediatric sarcoma.** Correlation between SLFN11 expression and the single-agent  
675 AUC **(A)** or mean **(B)** of the AUC for SN-38 and TAL after 72 h drug exposure as reported in the  
676 GDSC database. Olaparib and SN-38 appeared as two different batches in the database. **(C)**  
677 Correlation between the mean of the AUC for SN-38 and TAL from the GDSC and BRCA1  
678 mutational status as annotated in the COSMIC database. Dotted line equals the median activity  
679 of the highest quintile of SLFN11 expression (“Q5”) from **(B)**. **(D)** Distribution of the mean of the  
680 AUC for SN-38 and TAL from the GDSC in Ewing sarcoma (ES), rhabdomyosarcoma (RMS), OST  
681 (osteosarcoma), NB (neuroblastoma), and glioma cell lines. Cells marked “SLFN11 High” (salmon)  
682 expressed the highest quintile of SLFN11 expression (“Q5”) from **(B)**, while all others were  
683 defined as “SLFN11 Low” (teal). Dotted line equals the median activity of the highest quintile of  
684 SLFN11 expression (“Q5”) from **(B)**. **(E-F)** Mutational signatures and total number of mutations  
685 calculated from ES, RMS, and OST tumor samples from pediatric patients. BRCA-wt and BRCA-  
686 deficient samples were included as controls for MS3. Melanoma was included as a positive  
687 control for MS7. **(G)** SLFN11 status as assessed by immunohistochemistry in 353 samples from  
688 220 unique patients treated on solid tumor protocols at our institution. “SLFN11 Negative” was  
689 defined as H-score = 0, and “SLFN11 Positive” as H-score > 0. **(H)** SLFN11 H-score at diagnosis for  
690 select pediatric sarcoma. The mean H-score is reported for each tumor type.

691

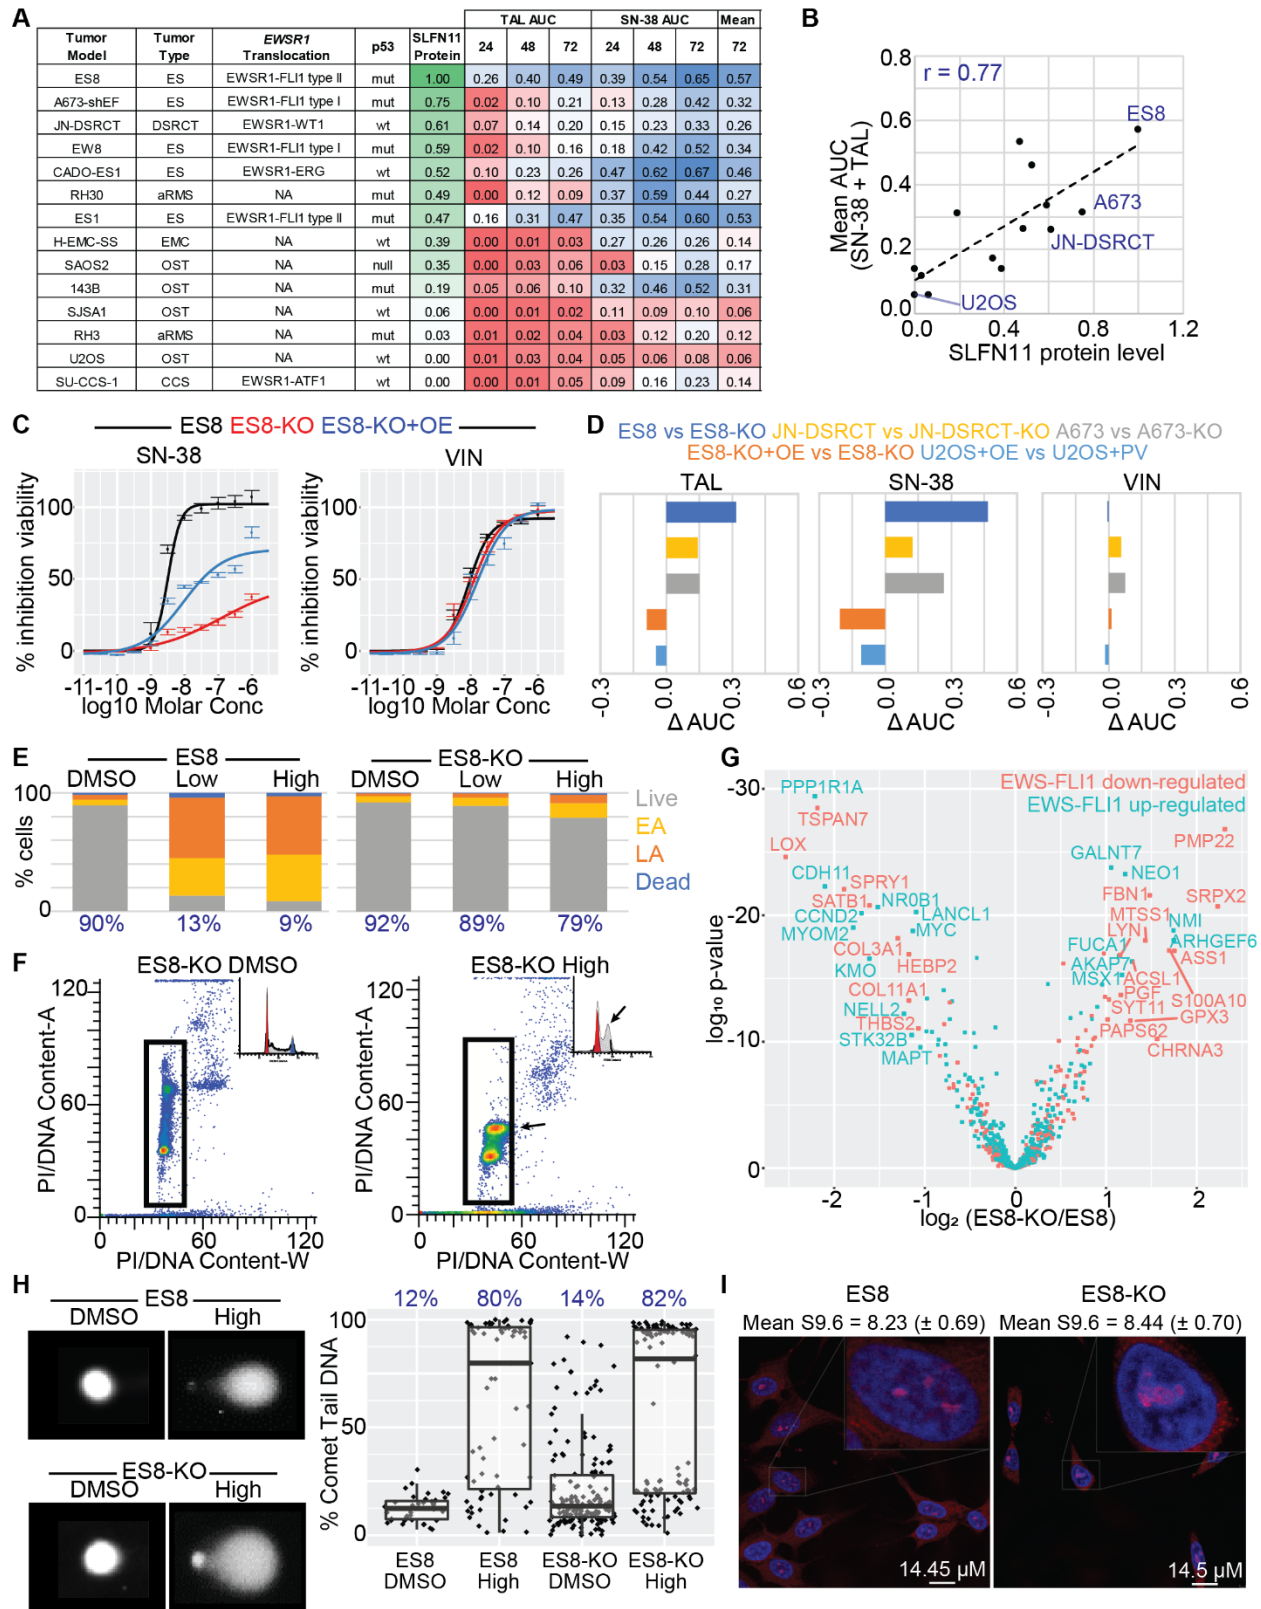

693 **Figure 2. SLFN11, not *EWSR1*-translocation or R-loop expression, predicted sensitivity to SN-38**  
694 **and TAL *in vitro*.** (A) SLFN11 protein levels and CellTiter-Glo (CTG) results for 14 sarcoma cell lines  
695 that varied by translocation status, p53 status, and histology. Protein levels were normalized to  
696 ES8. The area-under-the-curve (AUC) for the dose-response curve was calculated at 24, 48, and  
697 72 hours in the concentration range  $10^{-11}$  to  $10^{-4}$  Molar. Each value was then normalized to 700  
698 – the maximum observed AUC for 100% efficacy at all concentrations in the range – yielding a  
699 number from 0 to 1. Although extraskeletal myxoid chondrosarcoma (EMC) cancers such as H-  
700 EMC-SS typically have *EWSR1-NR4A3* fusions, we did not detect a *EWSR1*-translocation in this  
701 line.  $n \geq 2$ . (B) Correlation between SLFN11 protein levels and the mean of the AUC for SN-38 and  
702 TAL for the cell panel in (A). (C) CTG dose-response following 72h drug exposure of SN-38 and  
703 vincristine in ES8, ES8-KO, and ES8-KO+OE cells.  $n \geq 2$ . (D) Difference in normalized CTG AUC  
704 following 72 h drug exposure of TAL, SN-38, and vincristine in knockout and over-expression  
705 models.  $n \geq 2$ . (E) Flow cytometry assessment of cytotoxicity in ES8 and ES8-KO cells following  
706 24h exposure to ‘Low’ (10 nM SN-38 + 10 nM TAL) and ‘High’ (1  $\mu$ M SN-38 and 1  $\mu$ M TAL) drug  
707 combinations. The percent live cells is reported in blue. EA = early apoptosis. LA = late apoptosis.  
708  $n \geq 2$ . (F) Cell cycle analysis of ES8-KO cells following 24 h exposure to ‘Low’ SN-38+TAL. Arrows  
709 highlight the build-up of S-phase cells induced by the drug combination. (G) Volcano plot showing  
710 the difference in expression of reported EWS-FLI1 downregulated (salmon) and upregulated  
711 (teal) genes between ES8 and ES8-KO cells. Expression was assessed by microarray at 4 h and 24  
712 h following exposure to 0 and 2 Gy.  $n = 3$ . (H) Exemplar image and quantification of the alkaline  
713 comet tail assay of ES8 and ES8-KO cells following 2.5h exposure to the ‘High’ concentration of  
714 SN-38 and TAL. Mean percent comet tail DNA is reported in blue. (I) Immunofluorescence

715 quantification of R-loops in untreated ES8 and ES8-KO cells. Nuclei were stained with DAPI (blue)  
716 and R-loops were stained with S9.6 antibody (red). Mean (sem) S9.6 nuclear intensity is reported.  
717

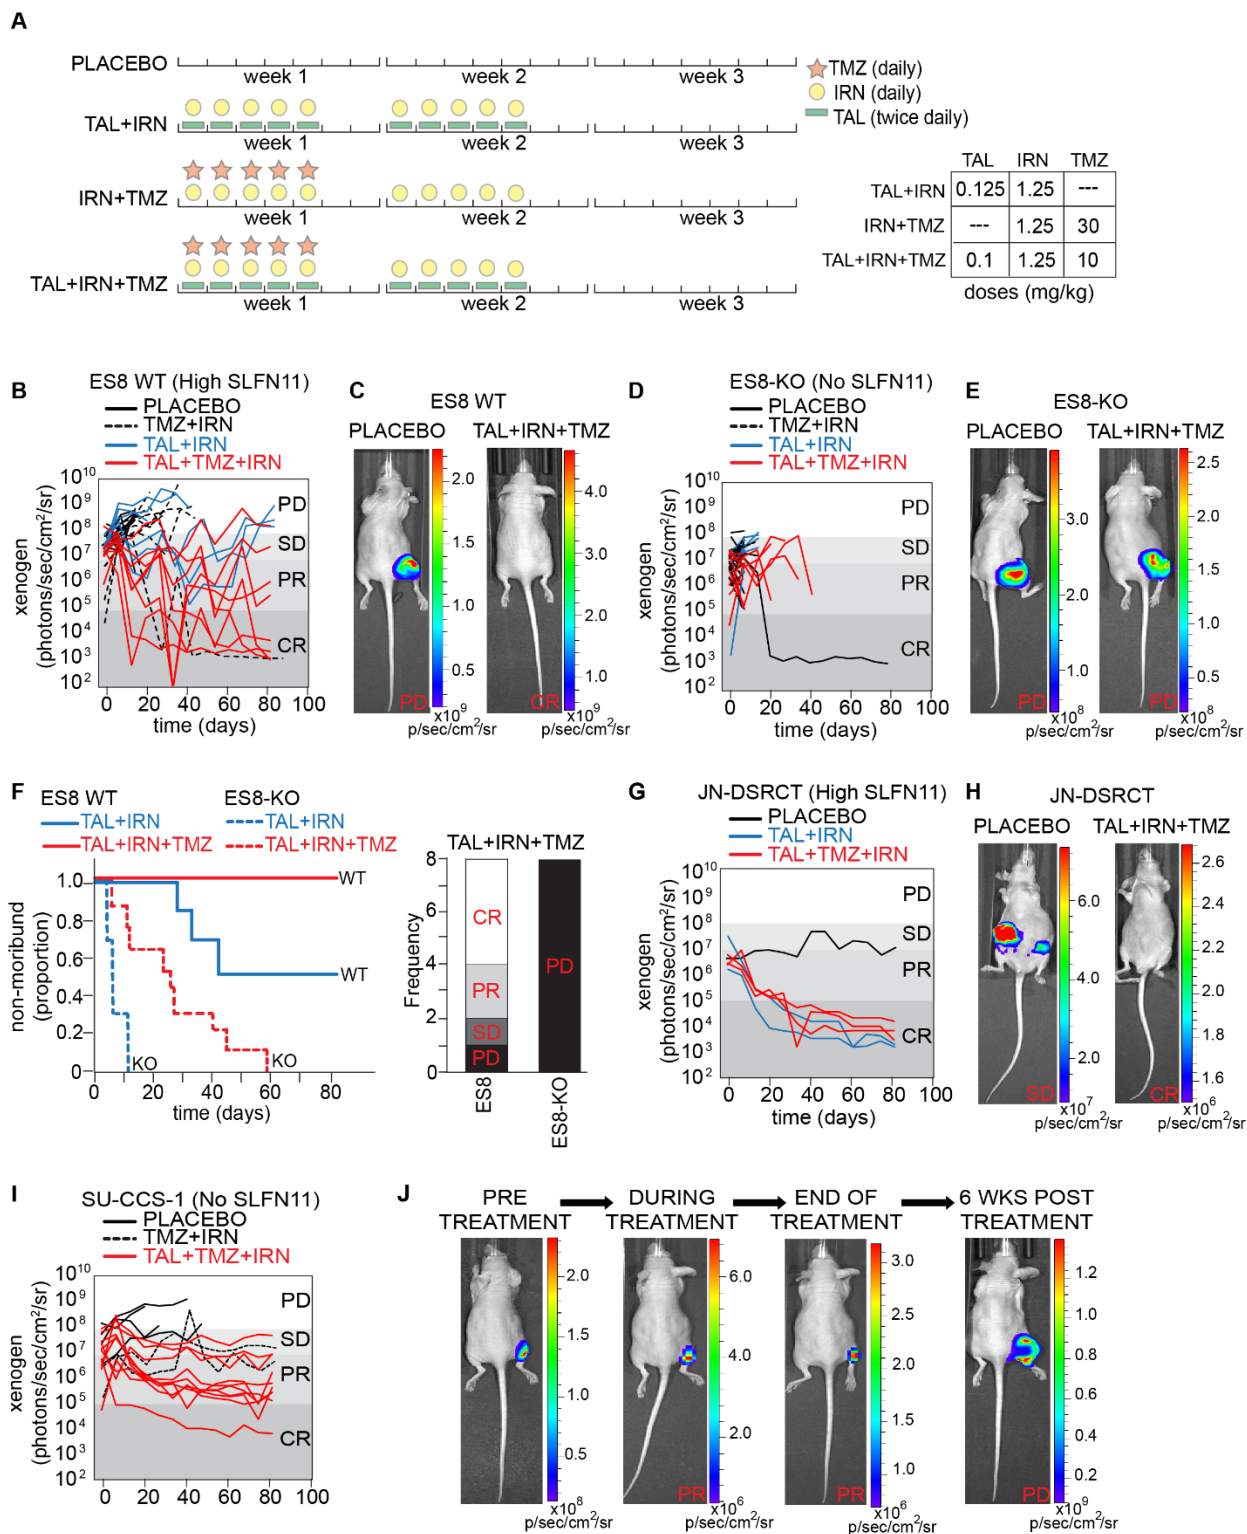

718

719

Figure 3

720 **Figure 3. SLFN11, not *EWSR1*-translocation, was required for sensitivity to SN-38 and TAL *in***  
721 ***vivo*. (A)** Drug schedule selected for each combination treatment regimen. **(B)** Line plot of tumor  
722 burden over time as measured by bioluminescence for ES8 xenografts. Each line is a different  
723 mouse. **(C)** Representative images from the study in **(B)** are shown with PD in the placebo control  
724 group and a CR in the TAL+TMZ+IRN group. **(D)** Line plot of tumor burden over time for ES8-KO  
725 xenografts. **(E)** Representative images from the study in **(D)** are shown with PD in both the  
726 placebo and TAL+TMZ+IRN groups. **(F)** Survival curves and response at end of treatment with  
727 TAL+TMZ+IRN for ES8 and ES8-KO models. **(G)** Line plot of tumor burden over time for JN-DSRCT  
728 xenografts. **(H)** Representative images from the study in **(G)** are shown with PD in the placebo  
729 group and a CR in the TAL+TMZ+IRN group. **(I)** Line plot of tumor burden over time for SU-CCS-1  
730 xenografts. **(J)** Representative images of a mouse treated over time in the TAL+TMZ+IRN group  
731 from **(I)** showing a PR during treatment and regrowth of tumor upon stopping therapy. PD,  
732 progressive disease; SD, stable disease; PR, partial response; CR, complete response.

733



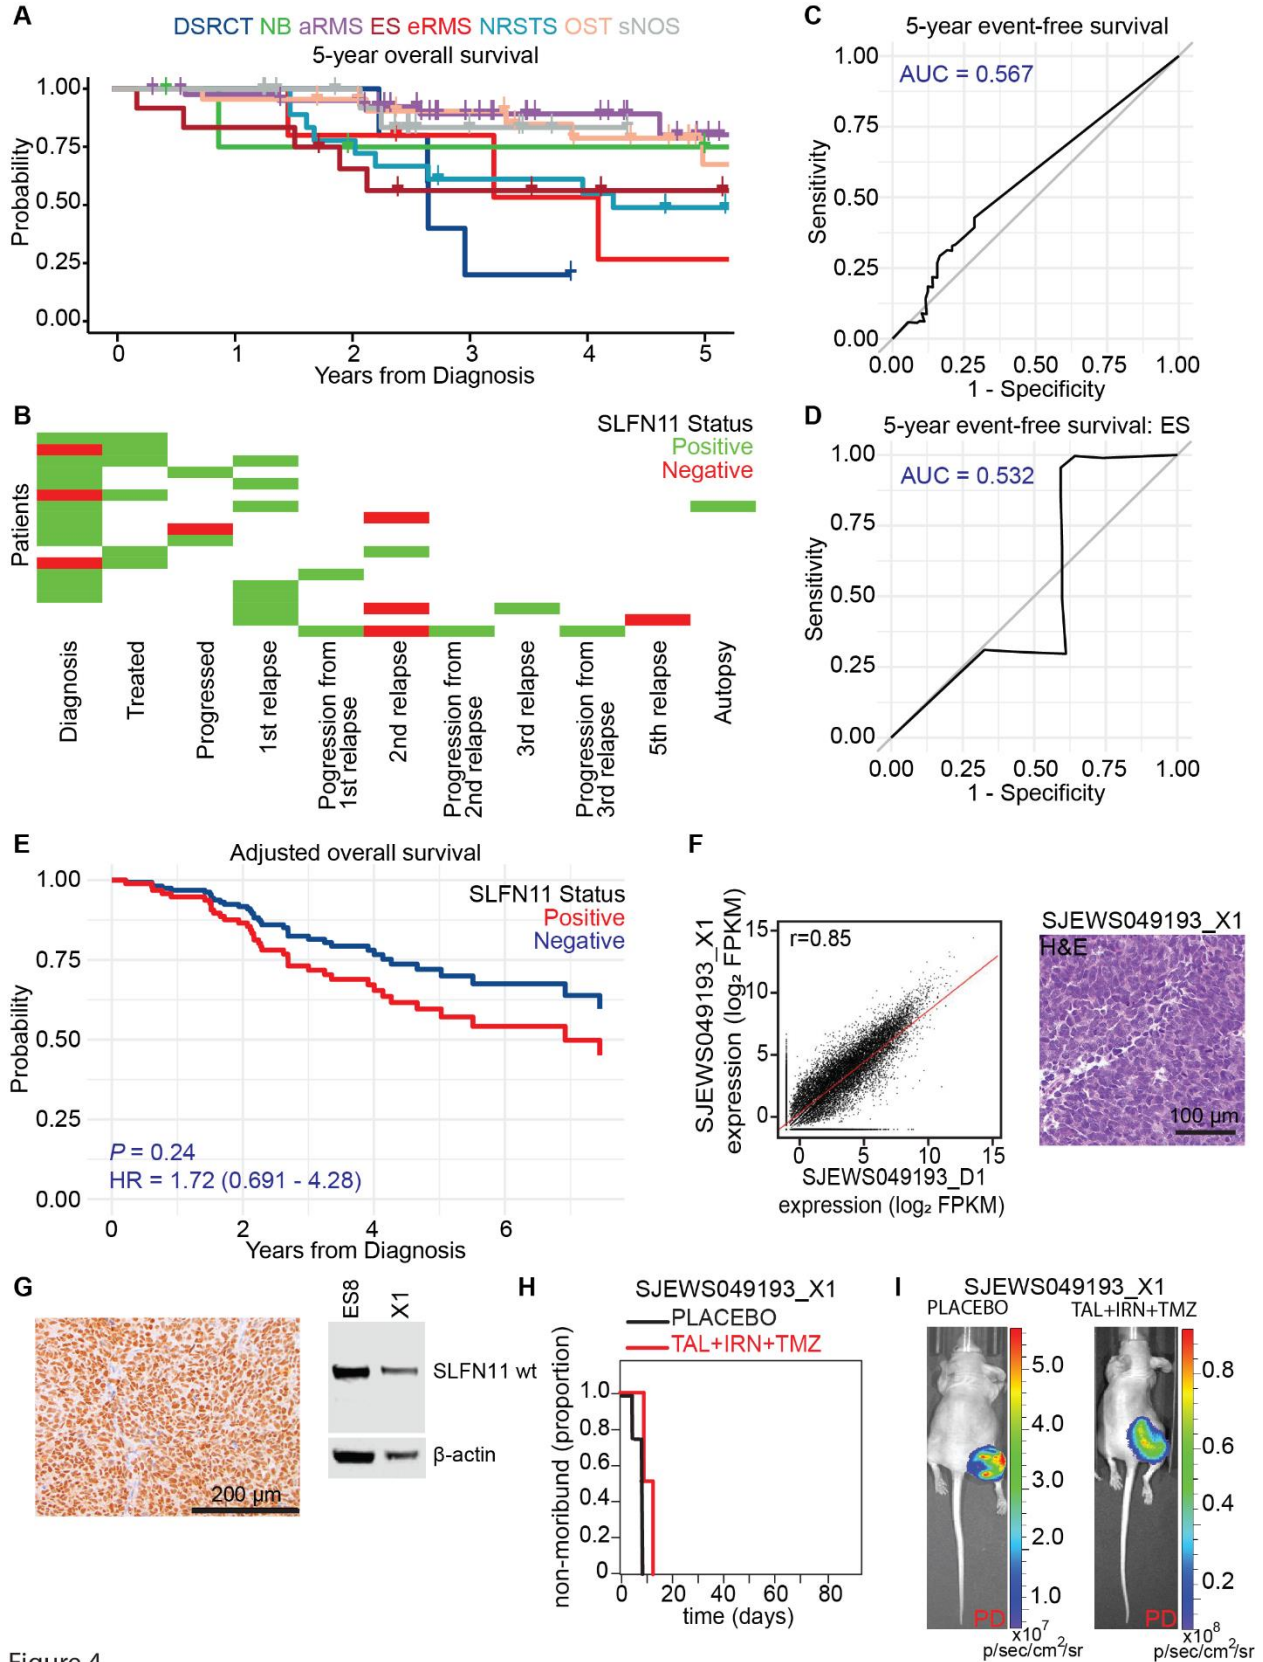

735 **Figure 4. SLFN11 expression was not associated with better outcomes in children with**  
736 **sarcomas. (A)** Five-year overall survival rates by diagnosis for the sarcoma patients in our IHC  
737 study. **(B)** SLFN11 status for 18 patients with at least two SLFN11 IHC measurements spanning  
738 different points in treatment. “Negative” and “Positive” SLFN11 status were defined as H-score  
739 equal to zero and H-score greater than 0, respectively. **(C)** ROC curve for five-year event free  
740 survival of all sarcoma patients as a function of H-score. **(D)** ROC curve for five-year event free  
741 survival of ES patients as a function of H-score. **(E)** Adjusted overall survival as a function of  
742 SLFN11 status after controlling for age, metastatic status, and disease. **(F)** RNA-seq expression  
743 profile comparing the ES patient-derived orthotopic xenograft model SJEWS049193\_X1 and the  
744 matched primary tumor (SJEWS049193\_D1, Pearson  $r = 0.85$ ), and hematoxylin and eosin stain  
745 of SJEWS049193\_X1. **(G)** SLFN11 IHC and Western blot from a SJEWS049193\_X1 tumor sample.  
746 **(H)** Survival curves for SJEWS049193\_X1 and **(I)** representative images from the efficacy study  
747 showing progressive disease (PD) in both the placebo and TAL+TMZ+IRN groups.  
748



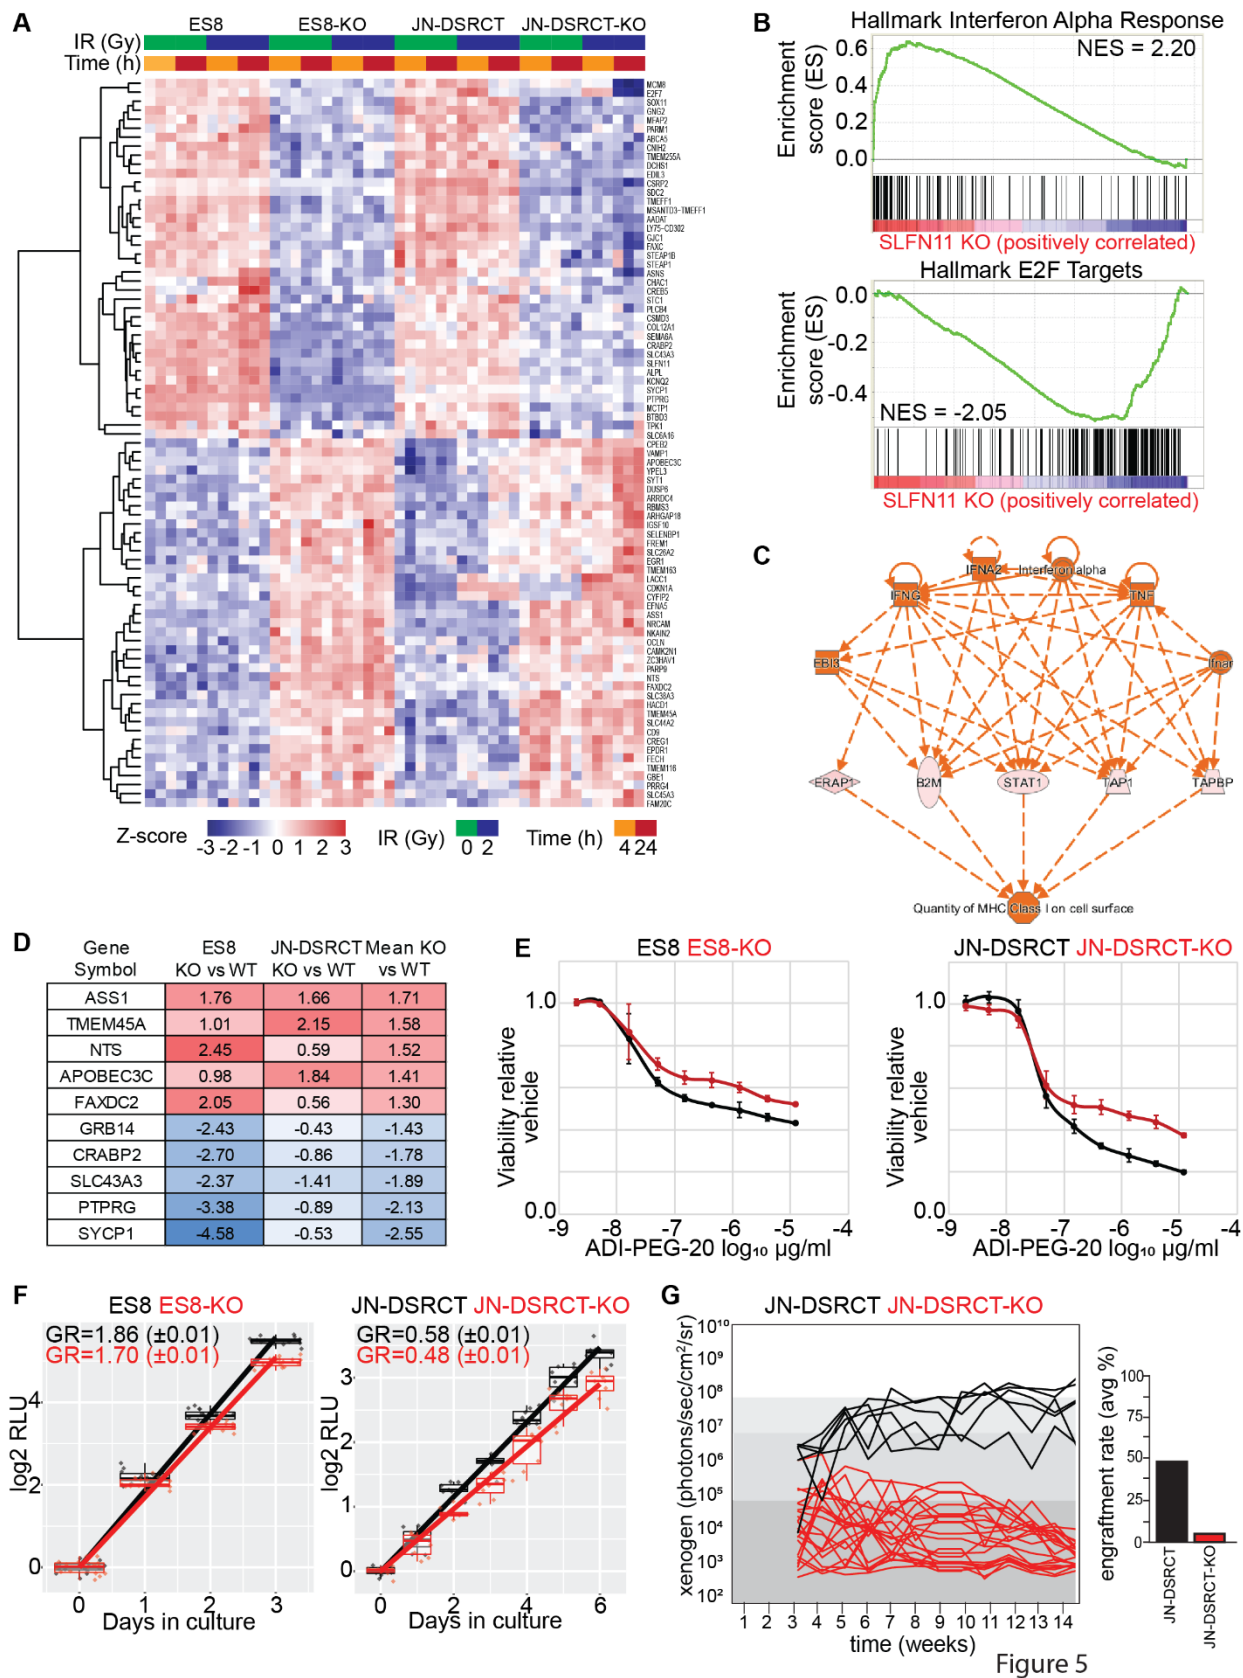

750 **Figure 5. SLFN11 augmented metabolism, evasion from the innate immune response, and**  
751 **proliferation in pediatric sarcomas. (A)** Heatmap of the most consistently differentially  
752 expressed genes ( $\geq 0.5$  log<sub>2</sub> unit change in the same direction) from a microarray experiment  
753 comparing ES8 and JN-DSRCT WT and KO cell lines at 4 h and 24 h following exposure to 0 and 2  
754 Gy. n = 3. **(B)** Highest scoring GSEA Hallmark gene sets enriched in KO (top) and wild-type  
755 (bottom) lines. **(C)** The top regulator in KO cells identified via IPA upstream regulator analysis. **(D)**  
756 Top five most differentially activated or inhibited genes (log<sub>2</sub> change in expression) in KO vs wild-  
757 type cells. **(E)** CTG assay assessing viability in KO and wild-type cells exposed to the pegylated  
758 arginine deiminase ADI-PEG-20. **(F)** Growth rate (GR) determination in KO vs wild-type cells,  
759 expressed as doublings/day (sem). **(G)** *In vivo* growth rate assessment comparing JN-DSRCT wild-  
760 type and KO models. Each cell line was injected at a cell density of 1 million cells/mouse. Xenogen  
761 measurements were started after 3-4 weeks for JN-DSRCT or JN-DSRCT-KO, then continued  
762 weekly.  
763

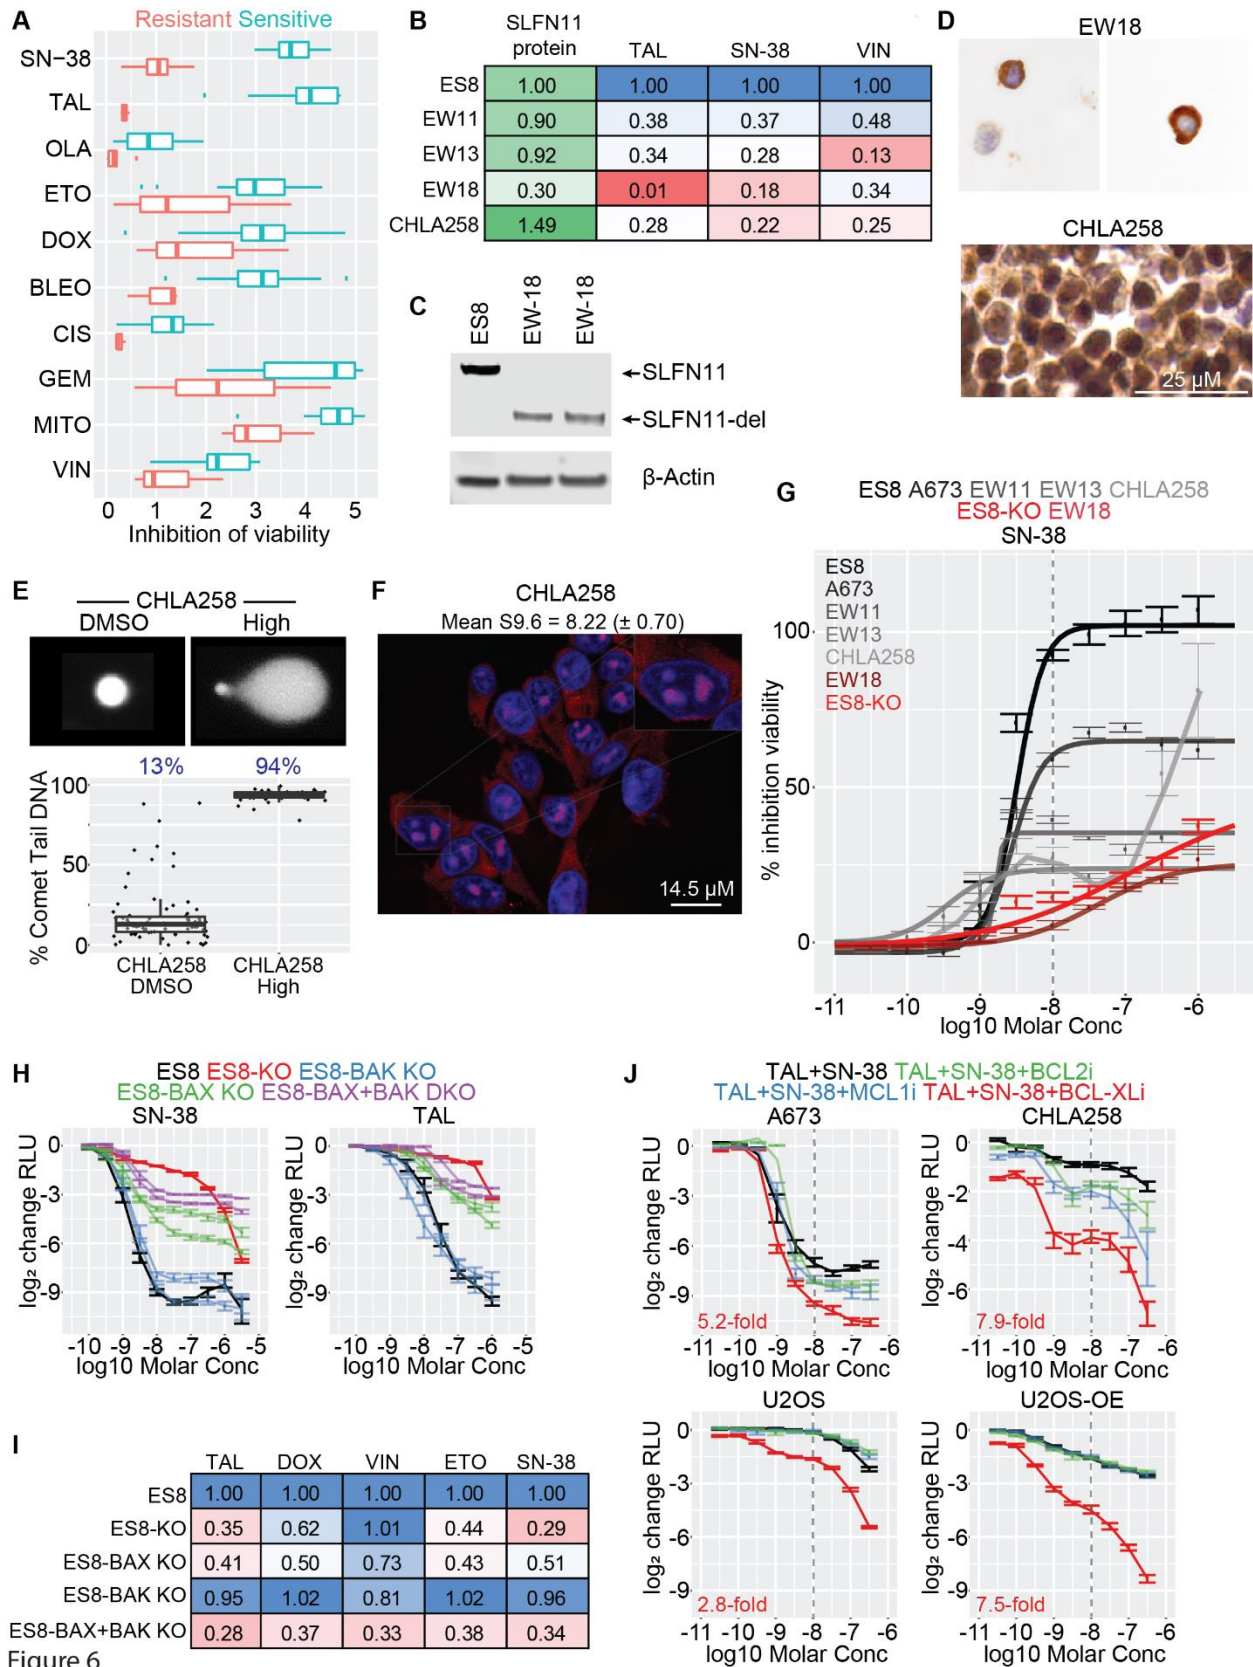

765 **Figure 6. BCL-Xli restored sensitivity to SN-38 and TAL in resistant SLFN11 expressing sarcoma**  
766 **cells. (A)** Boxplot comparing drug sensitivity in resistant and sensitive ES cell lines from the GDSC.  
767 **(B)** Heatmap of AUC values in four resistant ES cell lines normalized to ES8 (CTG assay, 72h drug  
768 exposure).  $n \geq 2$ . **(C)** Western blot from two biological replicates of EW-18 confirming expression  
769 of a truncated SLFN11 protein. **(D)** Confirmation of cytoplasmic and nuclear staining of SLFN11 in  
770 EW-18 and CHLA258, respectively. **(E)** Exemplar image and quantification of the alkaline comet  
771 tail assay of CHLA258 cells following 2.5 h exposure to the “High” concentration of SN-38 and  
772 TAL. Mean percent comet tail DNA is reported in blue. **(F)** Immunofluorescence quantification of  
773 R-loops in untreated CHLA258 cells. Nuclei were stained with DAPI (blue) and R-loops were  
774 stained with S9.6 antibody (red). Mean (sem) S9.6 nuclear intensity is reported. **(G)** Dose-  
775 response curves for SN-38 (CTG, 72 h) in ES8 (black), SLFN11 expressing resistant ES cell lines  
776 (grays), ES8 KO (red), and EW-18 (dark red).  $n \geq 2$ . **(H)** Dose-response curves for SN-38 and TAL  
777 (CTG, 72 h) in ES8 (black), ES8-KO (red), 2 ES8 BAK KO models (blue), 2 ES8 BAX KO models (green),  
778 and 2 ES8 BAK-KAX double KO models (purple).  $n \geq 2$ . **(I)** Heatmap of AUC values in ES8-KO and  
779 the BAK, BAX, and BAK-BAX KO models normalized to ES8 (CTG assay, 72 h drug exposure).  $n \geq 2$ .  
780 **(J)** Dose-response curves for a 1:1 mixture of SN-38 and TAL combined with either vehicle (DMSO,  
781 black), 1  $\mu$ M venetoclax (“BCL2i”, green), 1  $\mu$ M S63845 (“MCL1i”, blue), or 1  $\mu$ M A-1331852 (“BCL-  
782 Xli”, red) (CTG, 72 h).  $n \geq 2$ .
